# Supplementary material for: Allylic amination of Passerini adducts. Application to the selective synthesis of chromone-substituted α-and γ-amino acid peptidic and retropeptidic units
Source: Royal Society of Chemistry journal article supplement (doi:10.1039/c4ra05719h), 2014-08-18

*Supporting Information for*

**Allylic amination of Passerini adducts. Application to the selective synthesis of chromone-substituted  $\alpha$ - and  $\gamma$ -amino acid peptidic and retropeptidic units**

*Ana G. Neo,\* Lucía López-García and Carlos F. Marcos.\**

*Laboratorio de Química Orgánica y Bioorgánica (L.O.B.O.). Dept. Química Orgánica e Inorgánica. Facultad de Veterinaria. Universidad de Extremadura. 10071 Cáceres, Spain. E-mail: [aneo@unex.es](mailto:aneo@unex.es); [cfernán@unex.es](mailto:cfernán@unex.es)*

**TABLE OF CONTENTS**

Spectra

|                                                                        |     |
|------------------------------------------------------------------------|-----|
| <sup>1</sup> H-NMR of compound <b>1a</b>                               | S3  |
| <sup>13</sup> C-NMR of compound <b>1a</b>                              | S3  |
| <sup>1</sup> H-NMR of compound <b>1b</b>                               | S4  |
| <sup>13</sup> C-NMR of compound <b>1b</b>                              | S4  |
| <sup>1</sup> H-NMR of compound <b>1c</b>                               | S5  |
| <sup>13</sup> C-NMR of compound <b>1c</b>                              | S5  |
| <sup>1</sup> H-NMR of compound <b>1d</b>                               | S6  |
| <sup>13</sup> C-NMR of compound <b>1d</b>                              | S6  |
| <sup>1</sup> H-NMR of compound <b>1e</b>                               | S7  |
| <sup>13</sup> C-NMR of compound <b>1e</b>                              | S7  |
| <sup>1</sup> H-NMR of compound <b>5a</b>                               | S8  |
| <sup>13</sup> C-NMR of compound <b>5a</b>                              | S8  |
| <sup>1</sup> H-NMR of compound <b>5b</b>                               | S9  |
| <sup>13</sup> C-NMR of compound <b>5b</b>                              | S9  |
| <sup>1</sup> H-NMR of compound <b>5c</b>                               | S10 |
| <sup>13</sup> C-NMR of compound <b>5c</b>                              | S10 |
| <sup>1</sup> H-NMR of compound <b>5d</b>                               | S11 |
| <sup>13</sup> C-NMR of compound <b>5d</b>                              | S11 |
| <sup>1</sup> H-NMR of compound <b>5e</b>                               | S12 |
| <sup>13</sup> C-NMR of compound <b>5e</b>                              | S12 |
| <sup>1</sup> H-NMR of compound <b>5f</b>                               | S13 |
| <sup>13</sup> C-NMR of compound <b>5f</b>                              | S13 |
| <sup>1</sup> H-NMR of compound <b>5g</b>                               | S14 |
| <sup>13</sup> C-NMR of compound <b>5g</b>                              | S14 |
| <sup>1</sup> H-NMR of compound <b>5h</b>                               | S15 |
| <sup>13</sup> C-NMR of compound <b>5h</b>                              | S15 |
| <sup>1</sup> H-NMR of compound <b>5i</b>                               | S16 |
| <sup>13</sup> C-NMR of compound <b>5i</b>                              | S16 |
| <sup>1</sup> H-NMR of compound <b>5j</b> ( <i>diastereoisomer A</i> )  | S17 |
| <sup>13</sup> C-NMR of compound <b>5j</b> ( <i>diastereoisomer A</i> ) | S17 |
| <sup>1</sup> H-NMR of compound <b>5j</b> ( <i>diastereoisomer B</i> )  | S18 |

|                                                                                  |     |
|----------------------------------------------------------------------------------|-----|
| <sup>13</sup> C-NMR of compound <b>5j</b> ( <i>diastereoisomer B</i> )           | S18 |
| <sup>1</sup> H-NMR of compound <b>5k</b> ( <i>diastereoisomer A</i> )            | S19 |
| <sup>13</sup> C-NMR of compound <b>5k</b> ( <i>diastereoisomer A</i> )           | S19 |
| <sup>1</sup> H-NMR of compound <b>5l</b>                                         | S20 |
| <sup>13</sup> C-NMR of compound <b>5l</b>                                        | S20 |
| <sup>1</sup> H-NMR of compound <b>5m</b>                                         | S21 |
| <sup>13</sup> C-NMR of compound <b>5m</b>                                        | S21 |
| <sup>1</sup> H-NMR of compound <b>5n</b> ( <i>diastereoisomer A</i> )            | S22 |
| <sup>13</sup> C-NMR of compound <b>5n</b> ( <i>diastereoisomer A</i> )           | S22 |
| <sup>1</sup> H-NMR of compound <b>5n</b> ( <i>mixture of diastereoisomers</i> )  | S23 |
| <sup>13</sup> C-NMR of compound <b>5n</b> ( <i>mixture of diastereoisomers</i> ) | S23 |
| <sup>1</sup> H-NMR of compound <b>5o</b> ( <i>diastereoisomer A</i> )            | S24 |
| <sup>13</sup> C-NMR of compound <b>5o</b> ( <i>diastereoisomer A</i> )           | S24 |
| <sup>1</sup> H-NMR of compound <b>5o</b> ( <i>mixture of diastereoisomers</i> )  | S25 |
| <sup>13</sup> C-NMR of compound <b>5o</b> ( <i>mixture of diastereoisomers</i> ) | S25 |
| <sup>1</sup> H-NMR of compound <b>6a</b>                                         | S26 |
| <sup>13</sup> C-NMR of compound <b>6a</b>                                        | S26 |
| <sup>1</sup> H-NMR of compound <b>6b</b>                                         | S27 |
| <sup>13</sup> C-NMR of compound <b>6b</b>                                        | S27 |
| <sup>1</sup> H-NMR of compound <b>6c</b>                                         | S28 |
| <sup>13</sup> C-NMR of compound <b>6c</b>                                        | S28 |
| <sup>1</sup> H-NMR of compound <b>6d</b>                                         | S29 |
| <sup>13</sup> C-NMR of compound <b>6d</b>                                        | S29 |
| <sup>1</sup> H-NMR of compound <b>6f</b>                                         | S30 |
| <sup>13</sup> C-NMR of compound <b>6f</b>                                        | S30 |
| <sup>1</sup> H-NMR of compound <b>6g</b>                                         | S31 |
| <sup>13</sup> C-NMR of compound <b>6g</b>                                        | S31 |
| <sup>1</sup> H-NMR of compound <b>6h</b>                                         | S32 |
| <sup>13</sup> C-NMR of compound <b>6h</b>                                        | S32 |
| <sup>1</sup> H-NMR of compound <b>6i</b>                                         | S33 |
| <sup>13</sup> C-NMR of compound <b>6i</b>                                        | S33 |
| <sup>1</sup> H-NMR of compound <b>6j</b>                                         | S34 |
| <sup>13</sup> C-NMR of compound <b>6j</b>                                        | S34 |
| <sup>1</sup> H-NMR of compound <b>6p</b>                                         | S35 |
| <sup>13</sup> C-NMR of compound <b>6p</b>                                        | S35 |

$^1\text{H-NMR}$  and  $^{13}\text{C-NMR}$  of compound **1a**

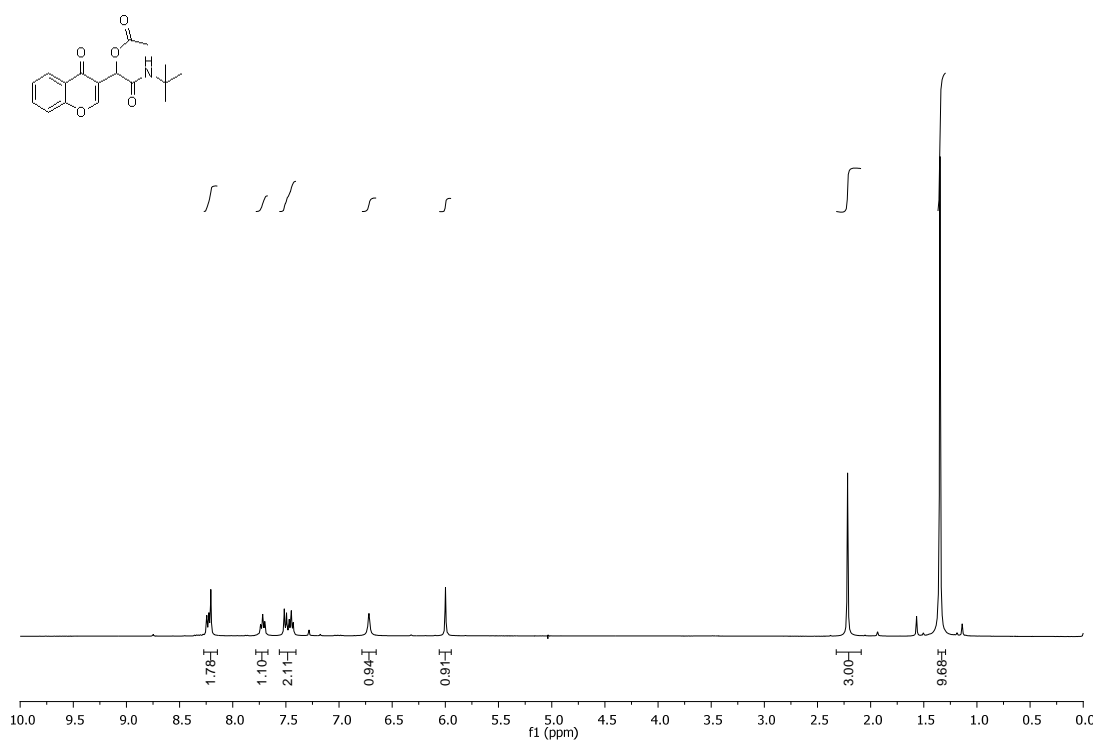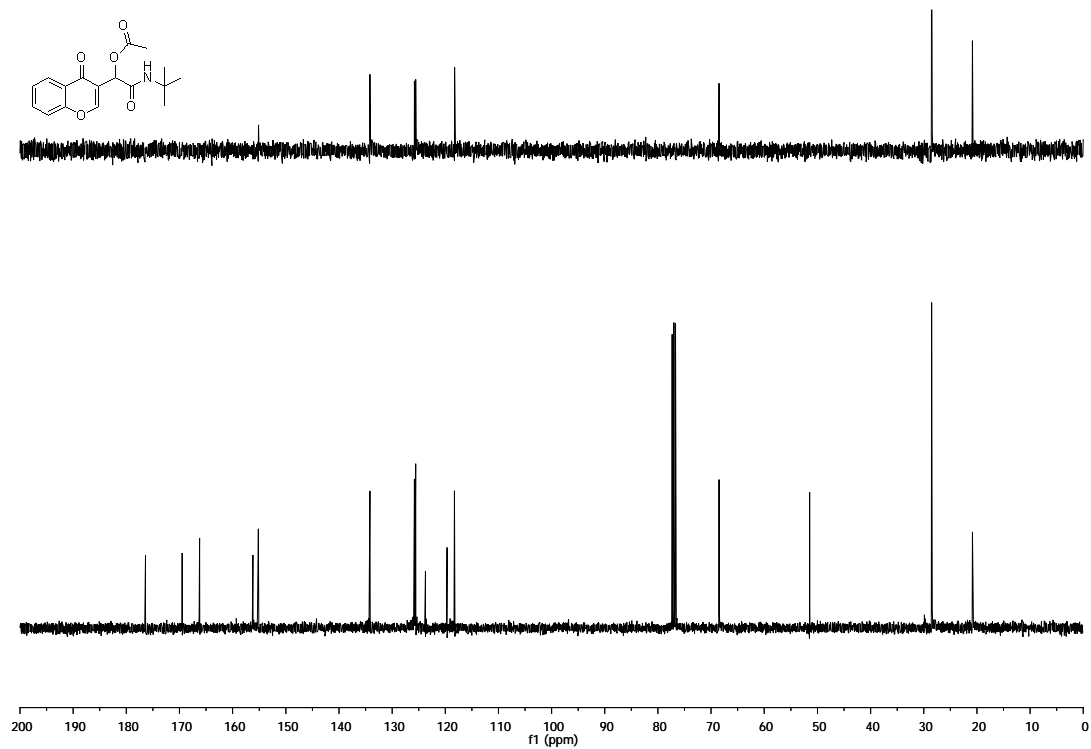

$^1\text{H-NMR}$  and  $^{13}\text{C-NMR}$  of compound **1b**

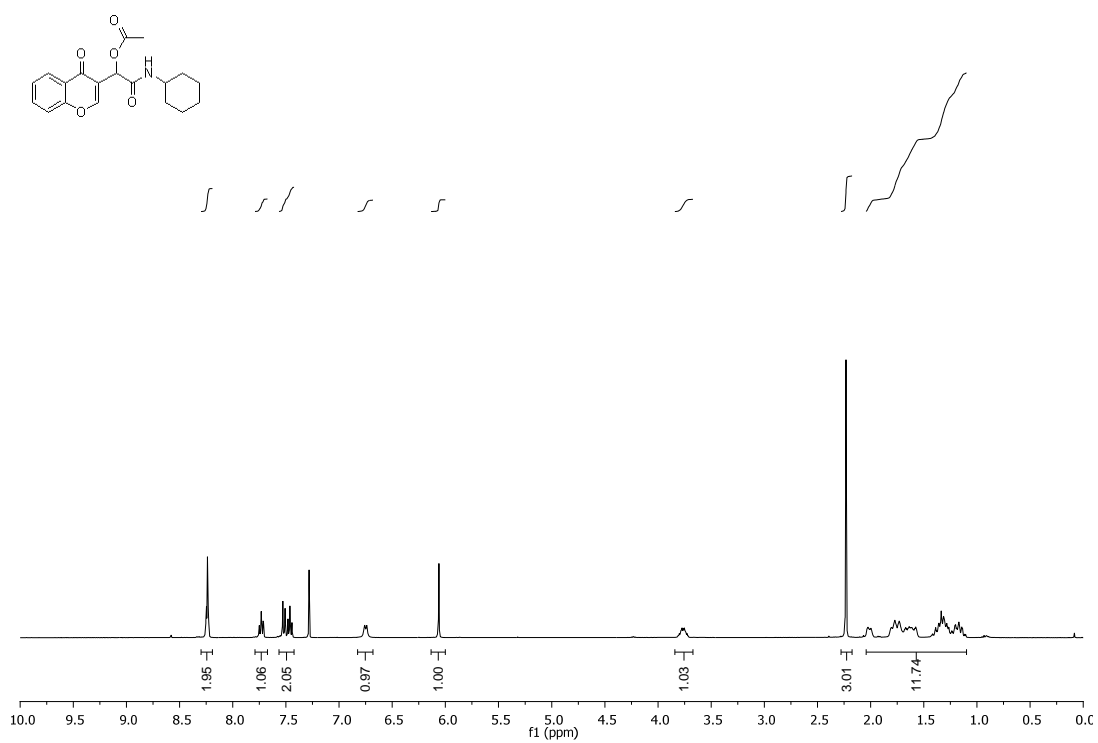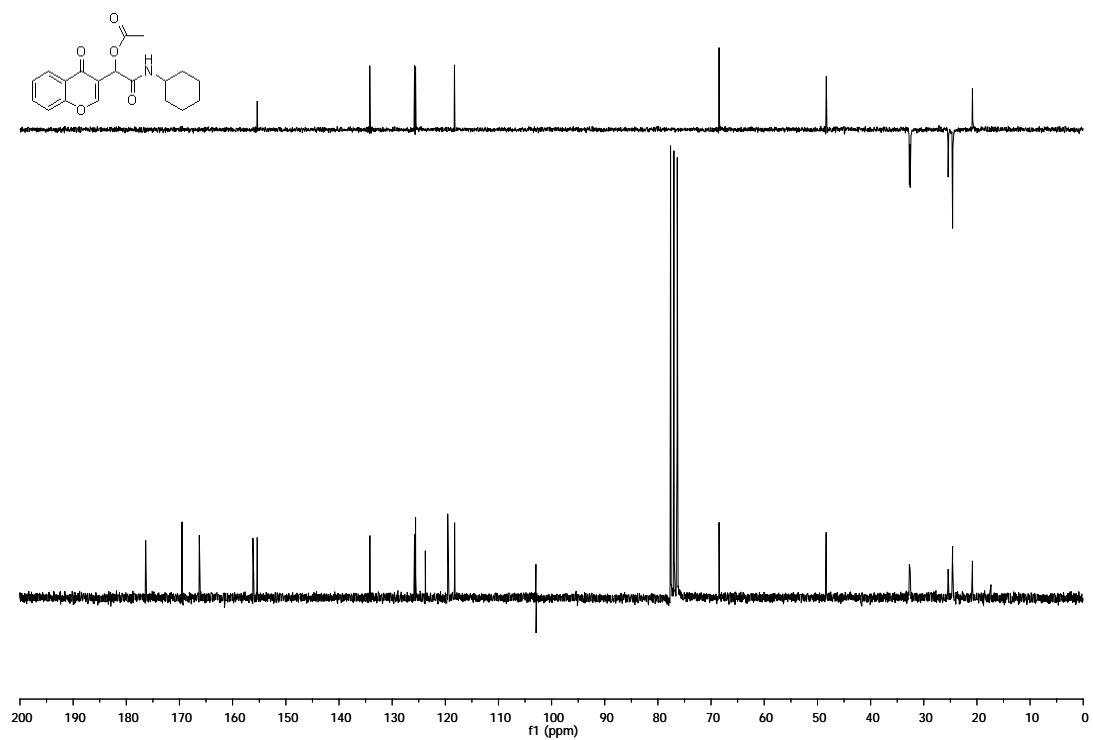

$^1\text{H-NMR}$  and  $^{13}\text{C-NMR}$  of compound **1c**

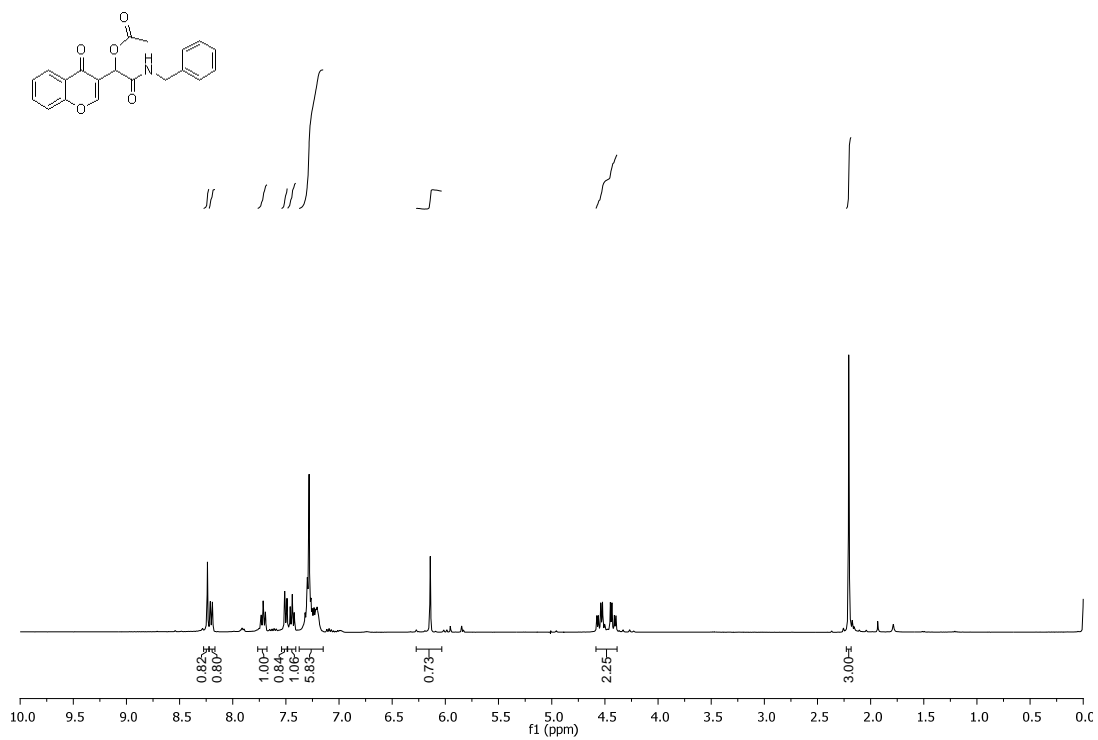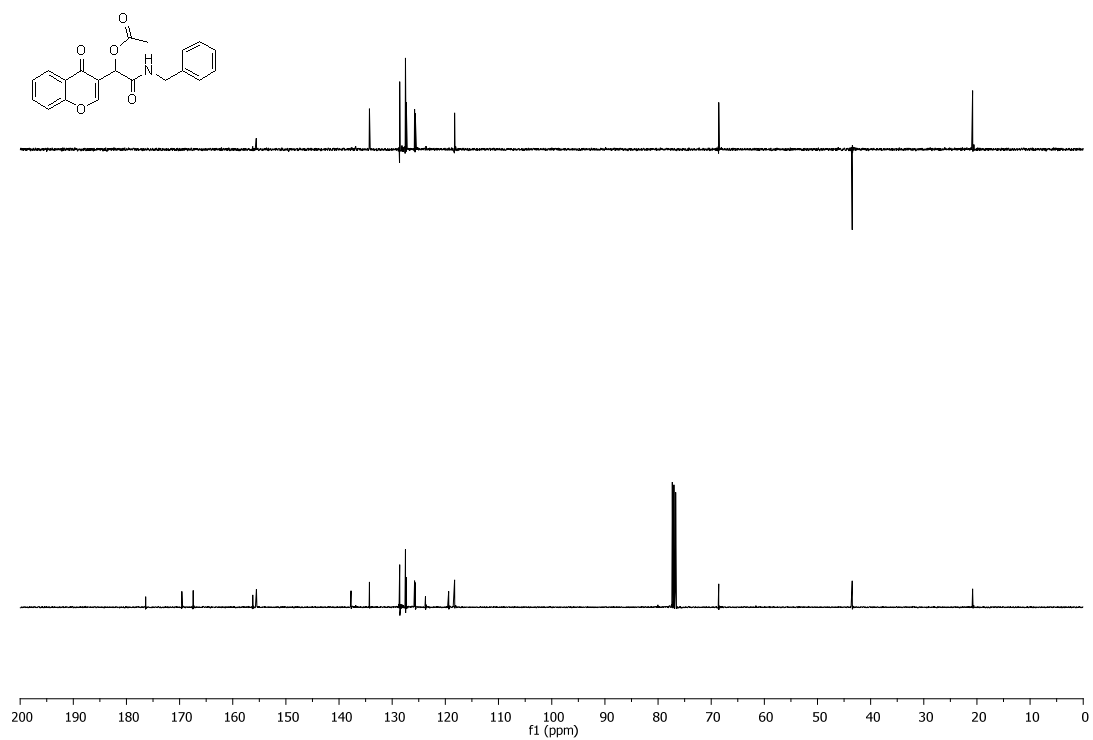

$^1\text{H-NMR}$  and  $^{13}\text{C-NMR}$  of compound **1d**

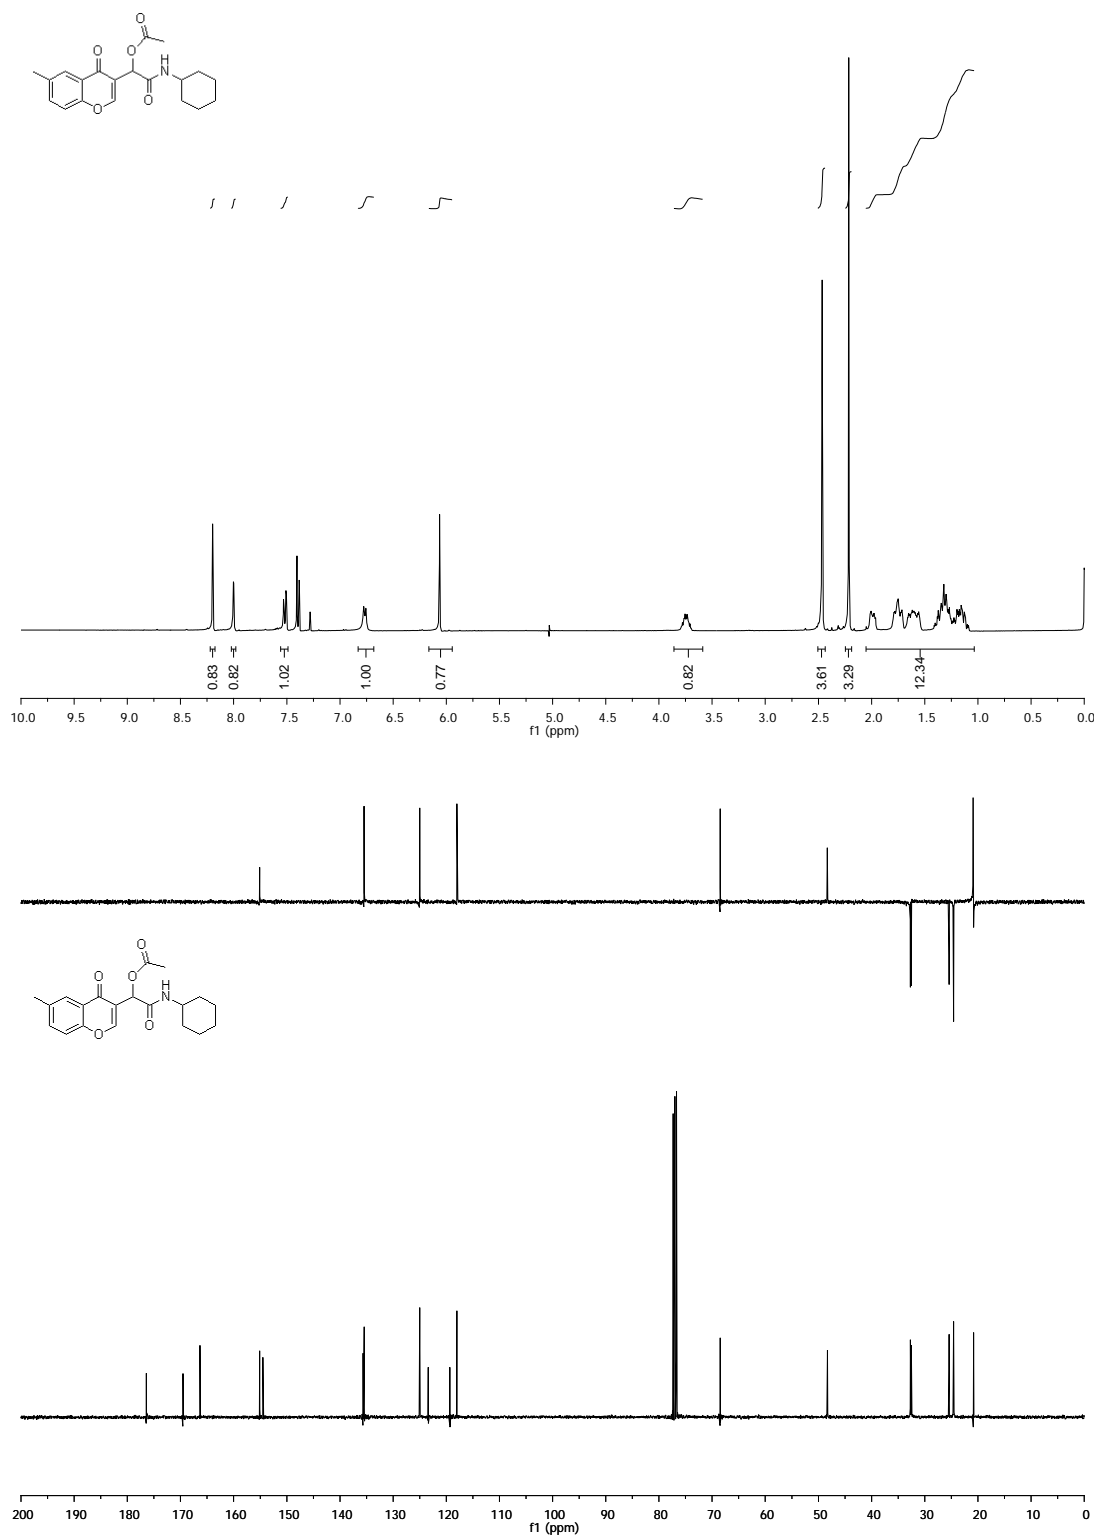

$^1\text{H-NMR}$  and  $^{13}\text{C-NMR}$  of compound **1e**

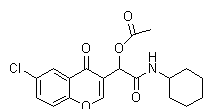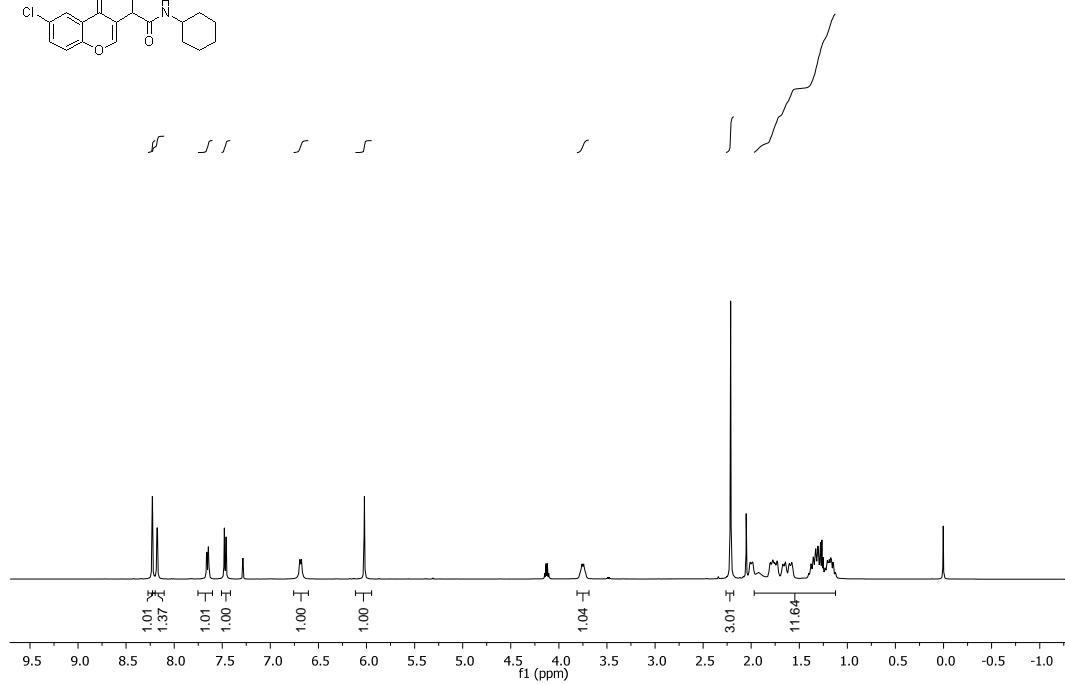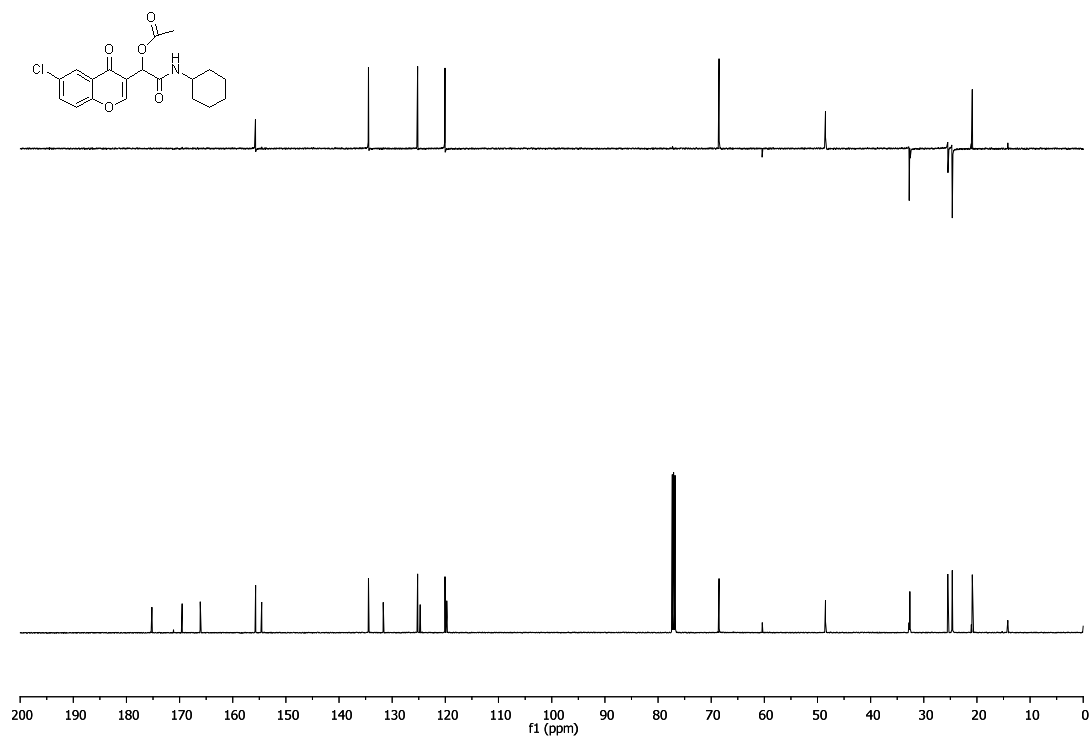

$^1\text{H-NMR}$  and  $^{13}\text{C-NMR}$  of compound **5a**

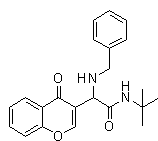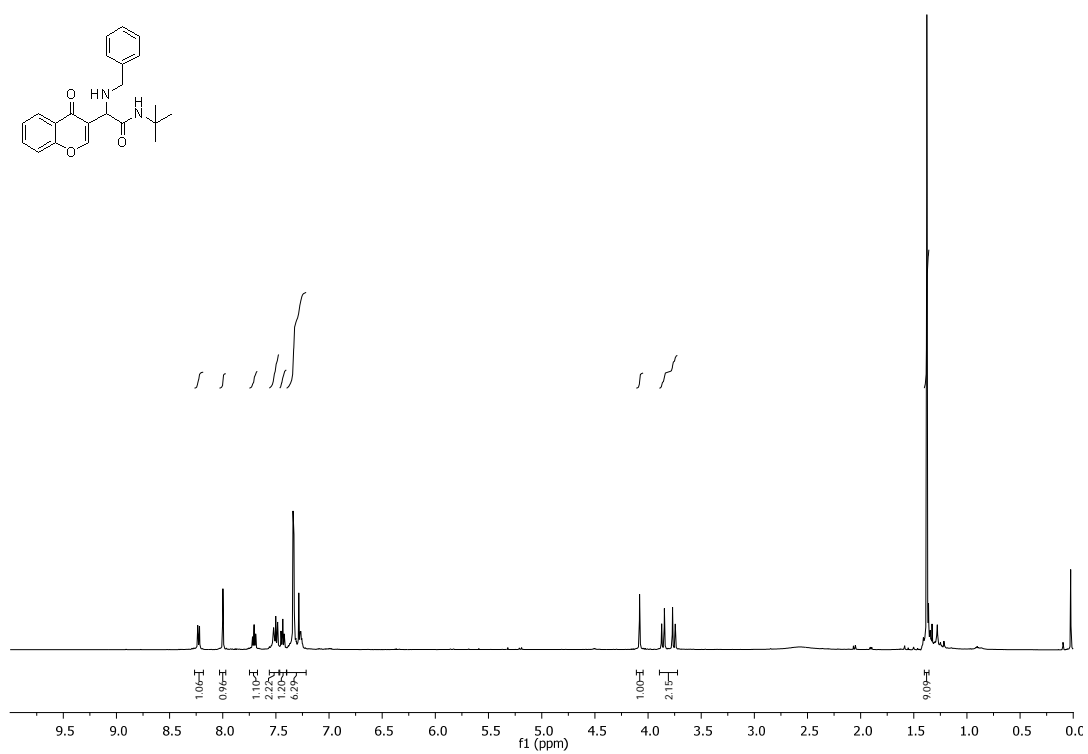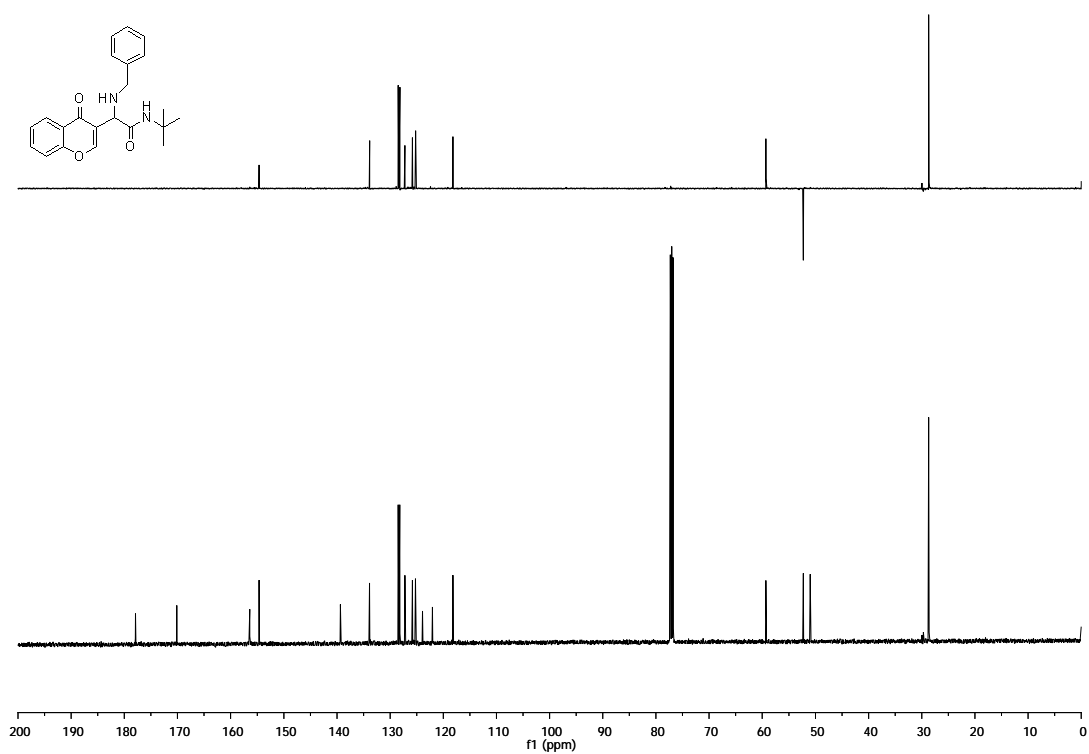



$^1\text{H-NMR}$  and  $^{13}\text{C-NMR}$  of compound **5b**

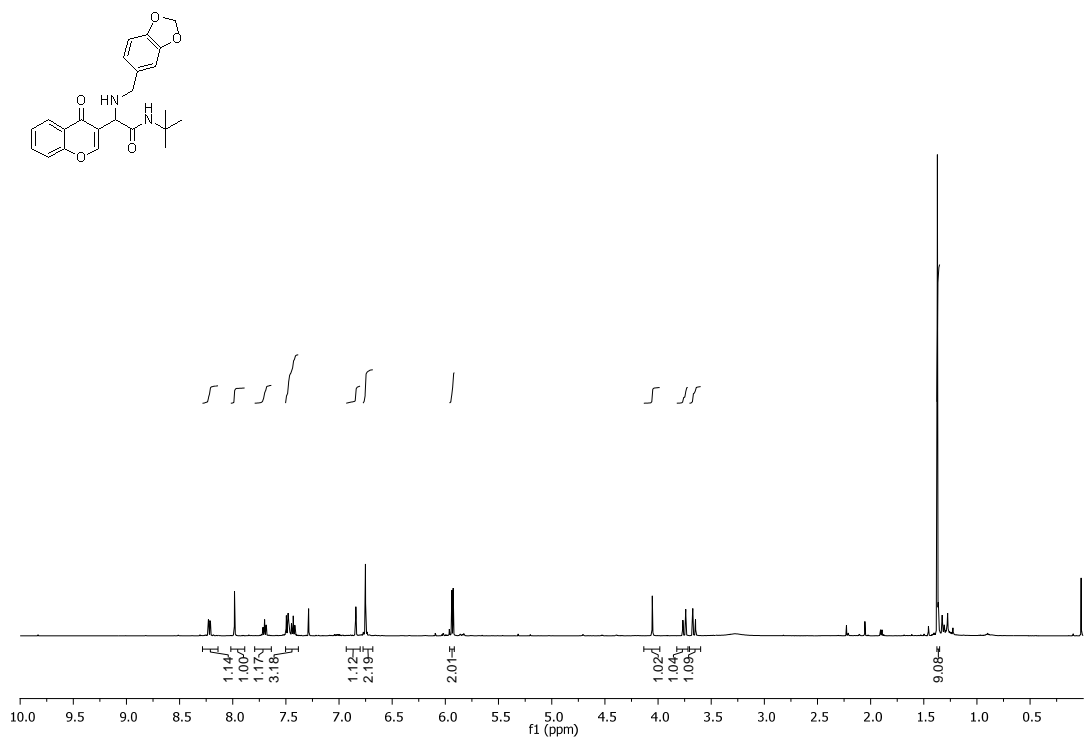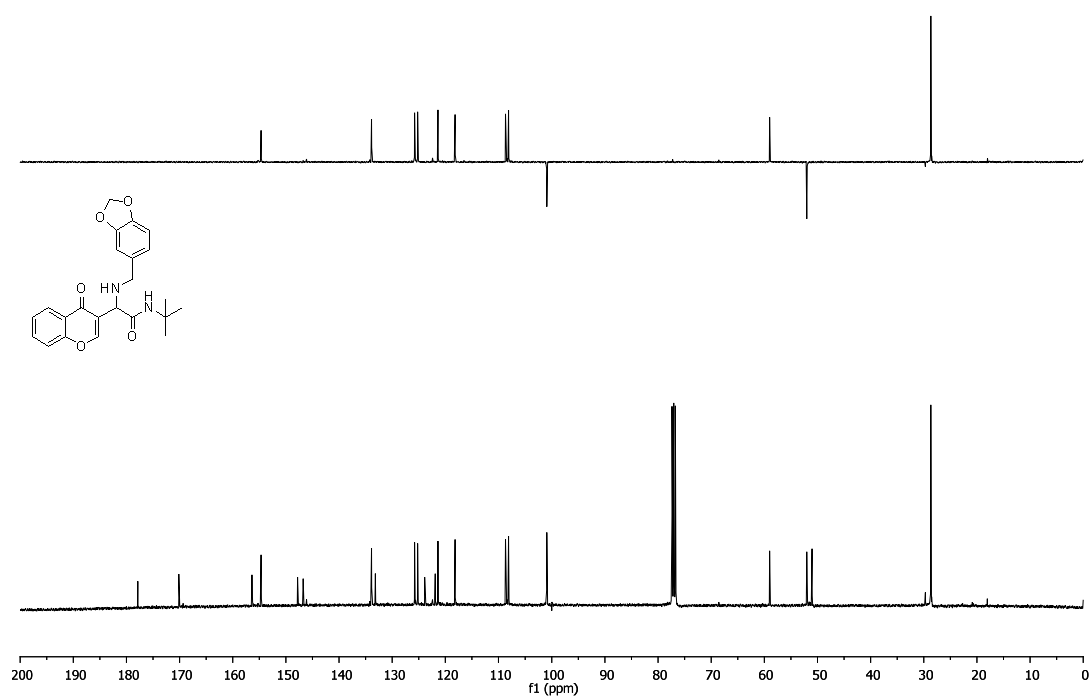

$^1\text{H-NMR}$  and  $^{13}\text{C-NMR}$  of compound **5c**

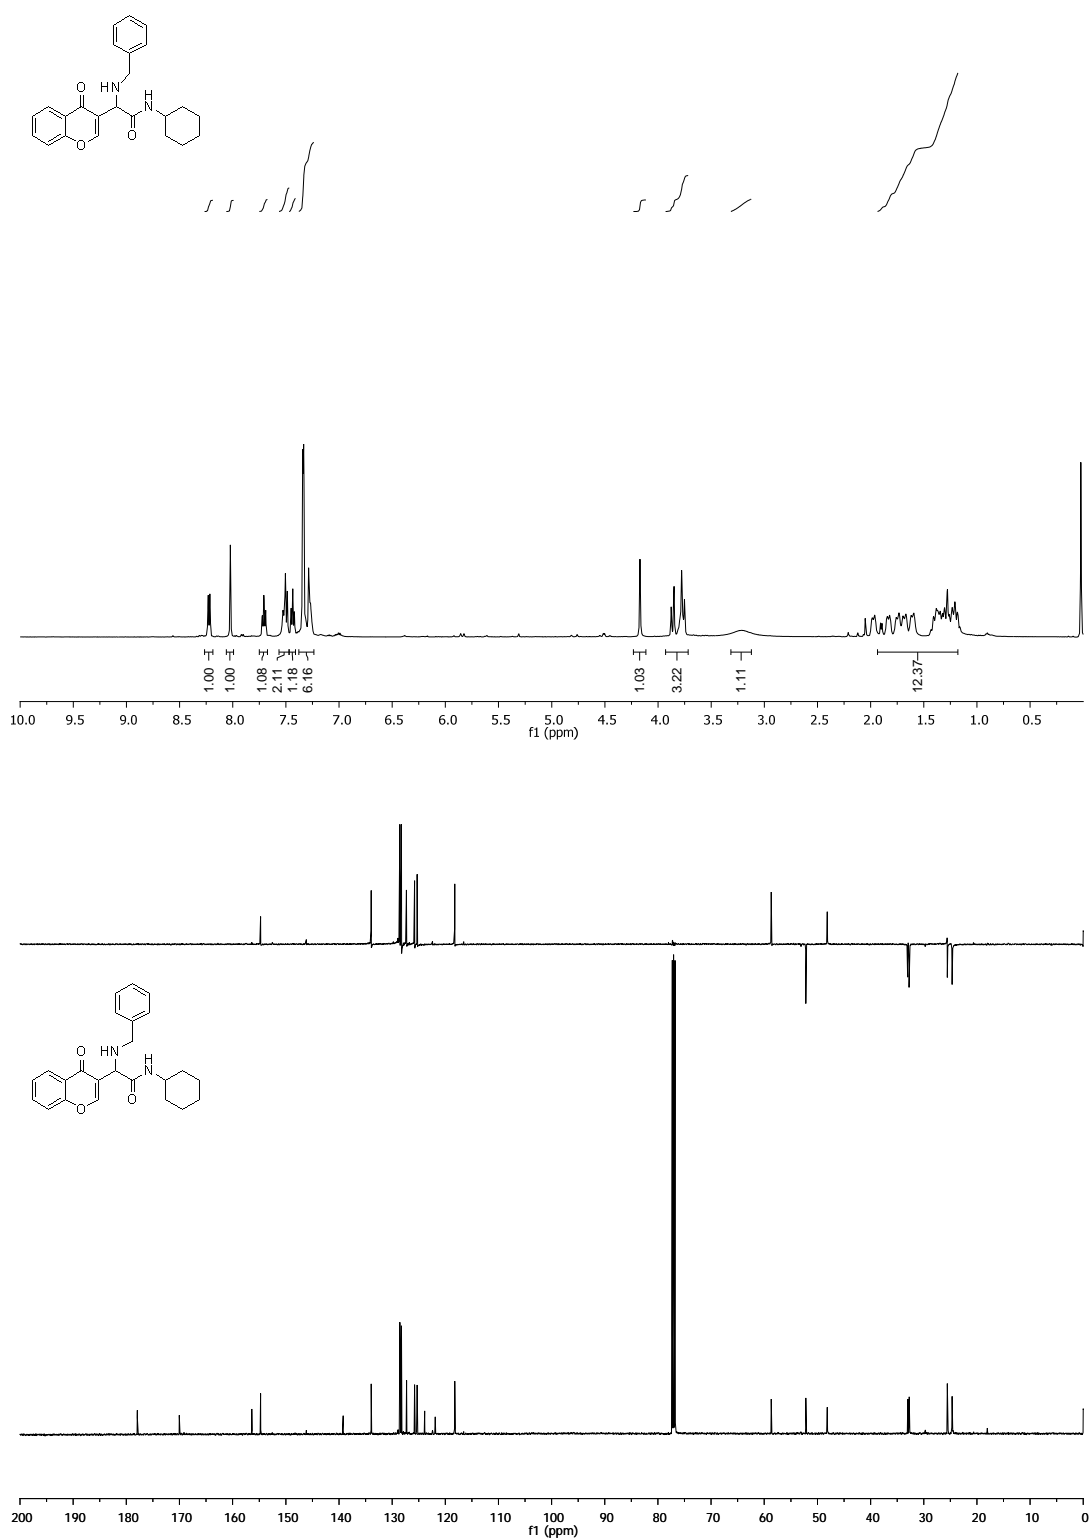

$^1\text{H-NMR}$  and  $^{13}\text{C-NMR}$  of compound **5d**

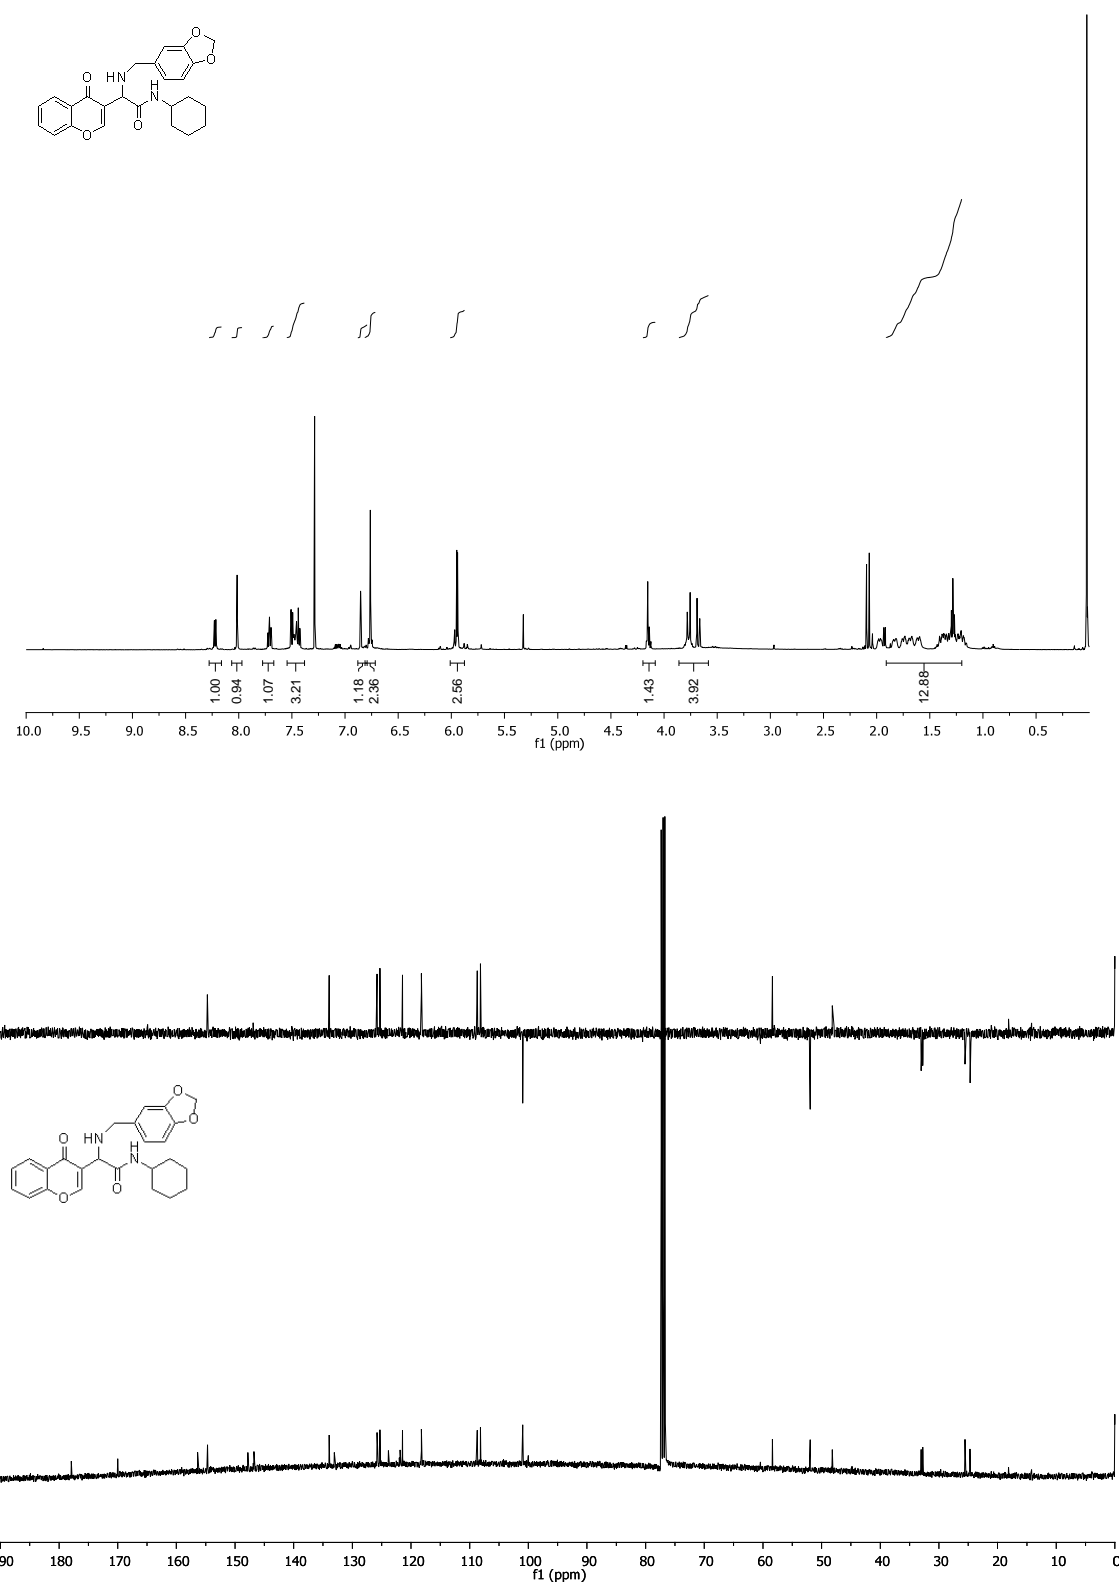

$^1\text{H-NMR}$  and  $^{13}\text{C-NMR}$  of compound **5e**

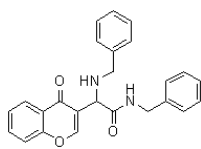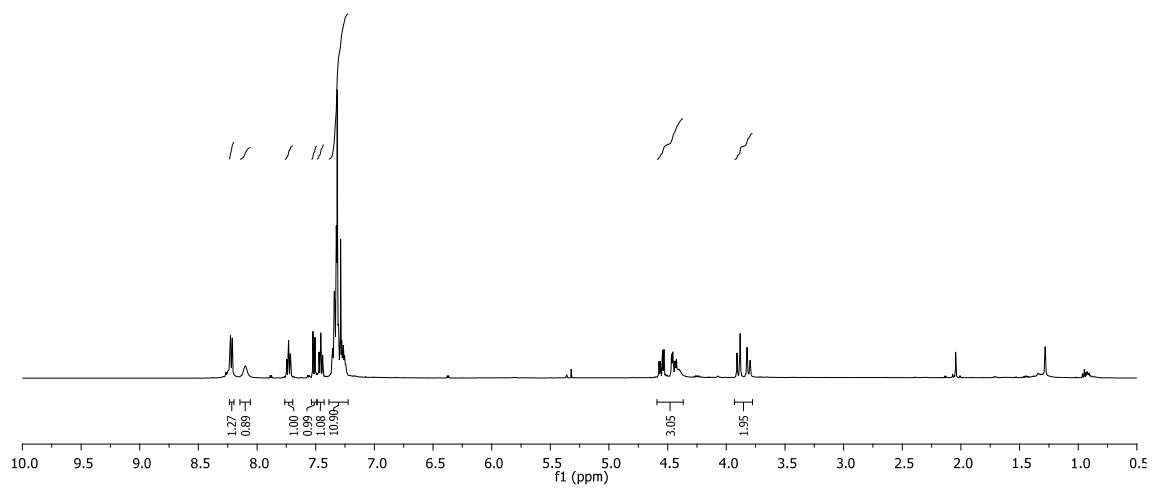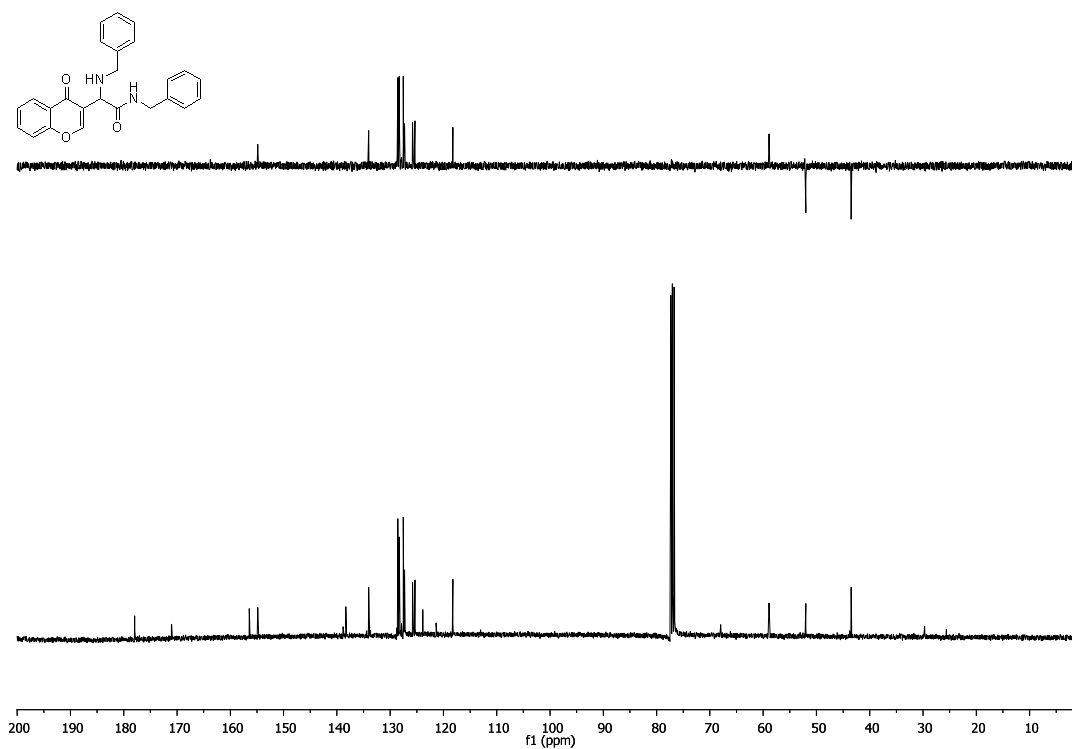

$^1\text{H-NMR}$  and  $^{13}\text{C-NMR}$  of compound **5f**

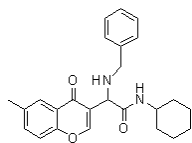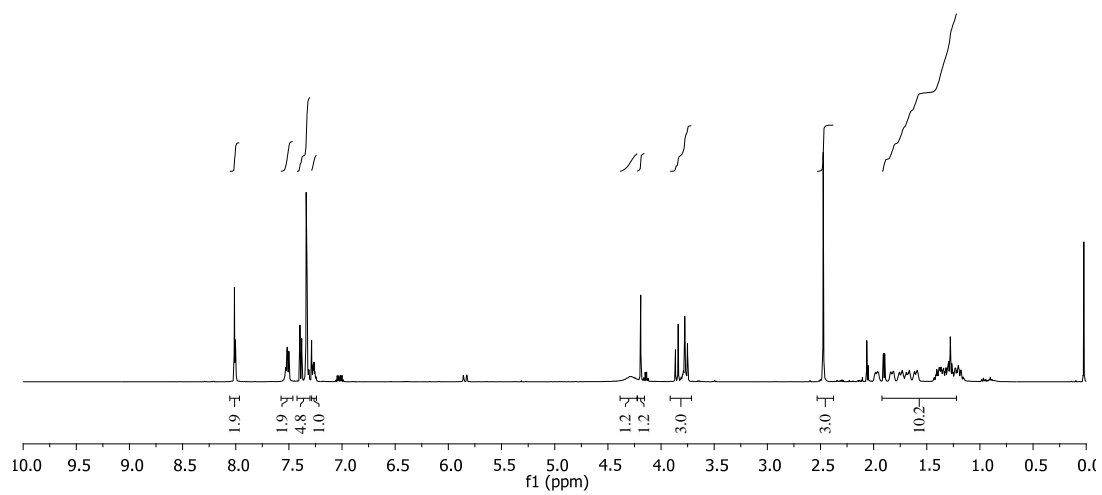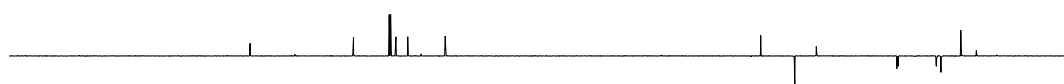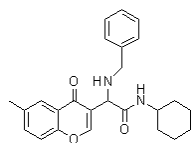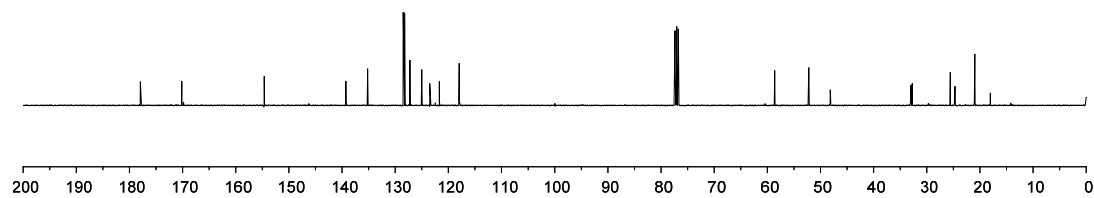

$^1\text{H-NMR}$  and  $^{13}\text{C-NMR}$  of compound **5g**

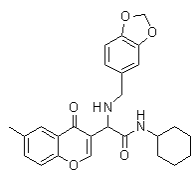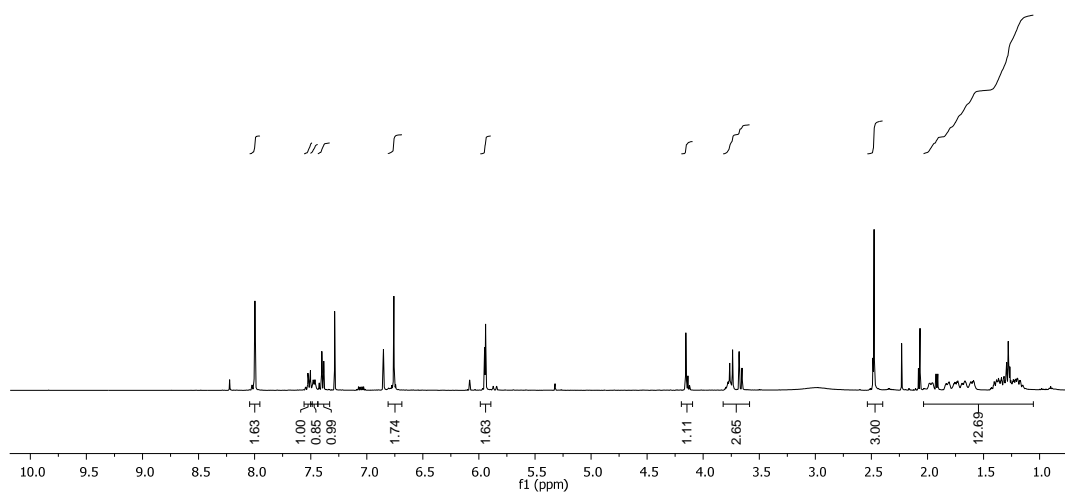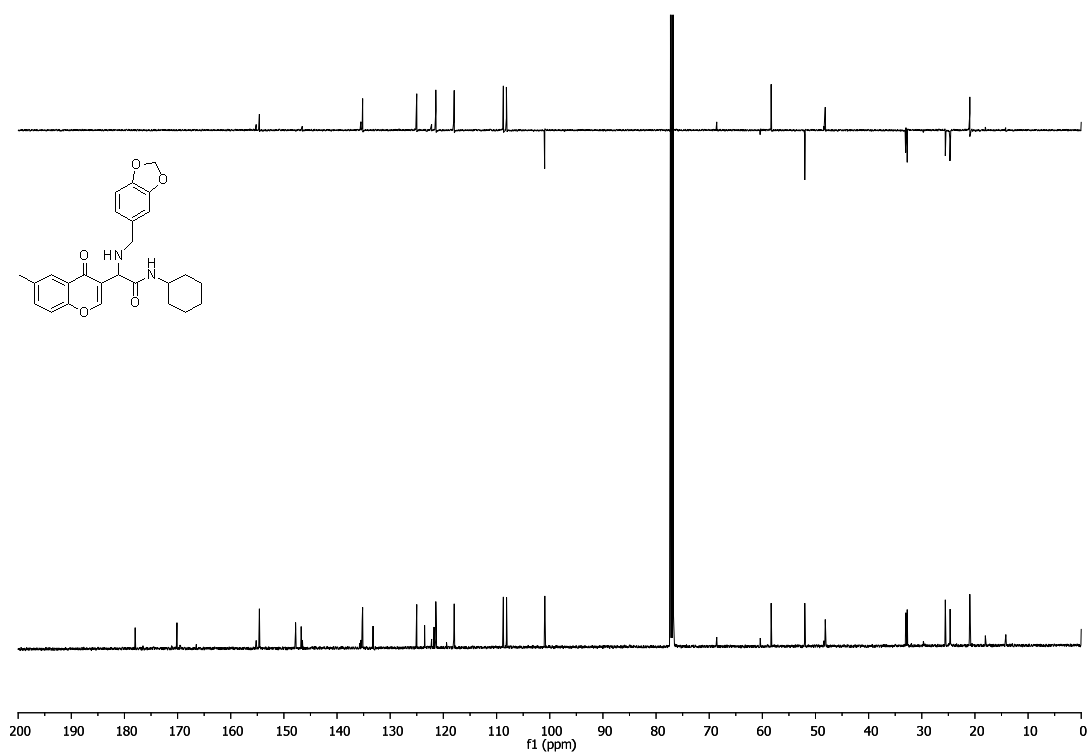

$^1\text{H-NMR}$  and  $^{13}\text{C-NMR}$  of compound **5h**

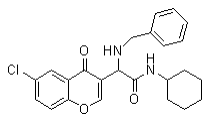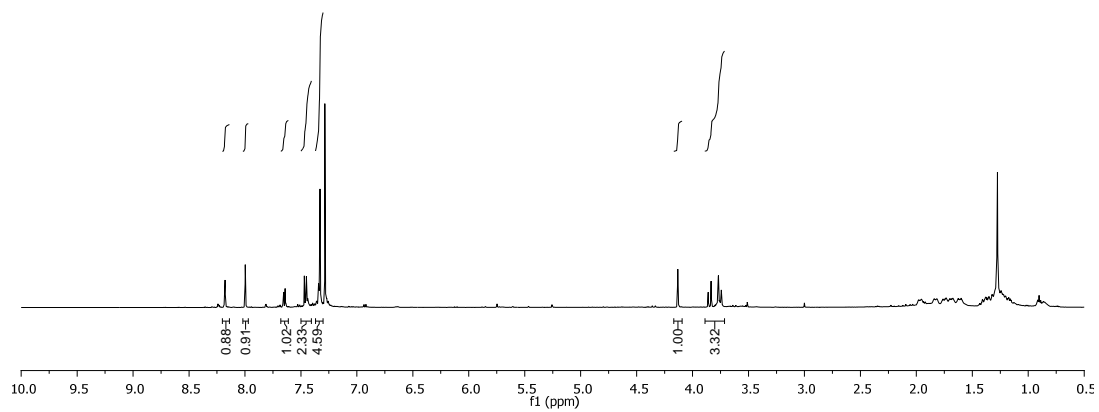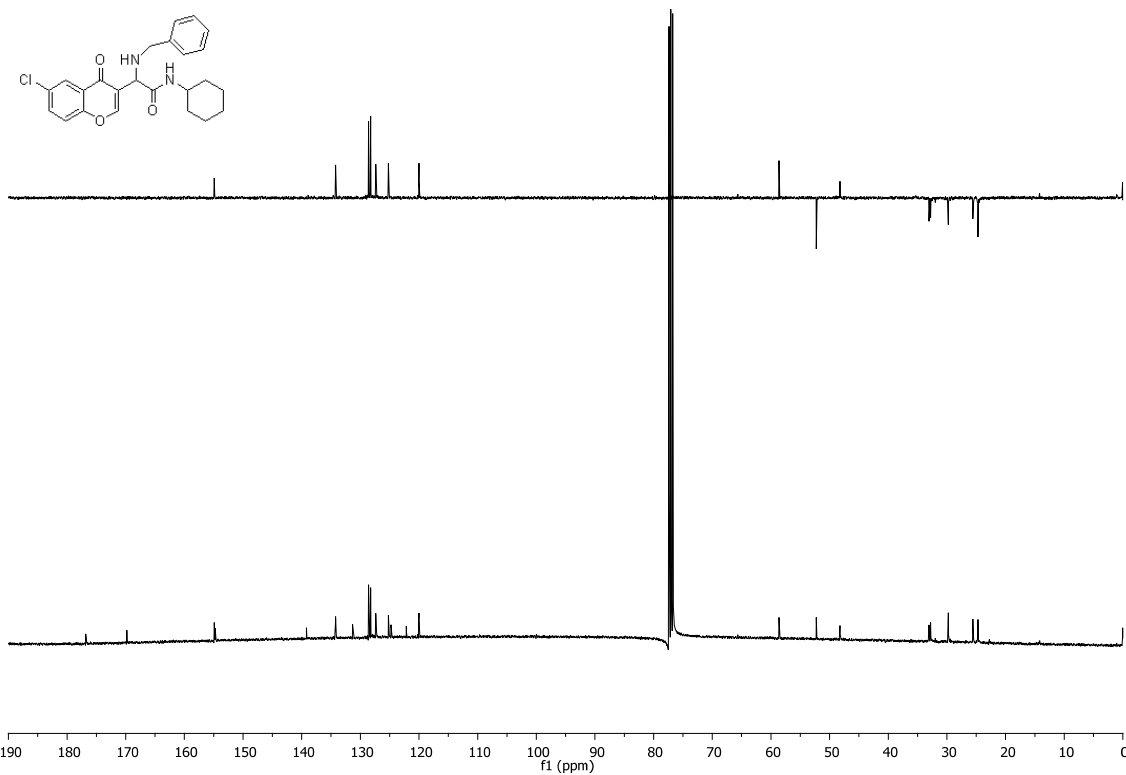

$^1\text{H-NMR}$  and  $^{13}\text{C-NMR}$  of compound **5i**

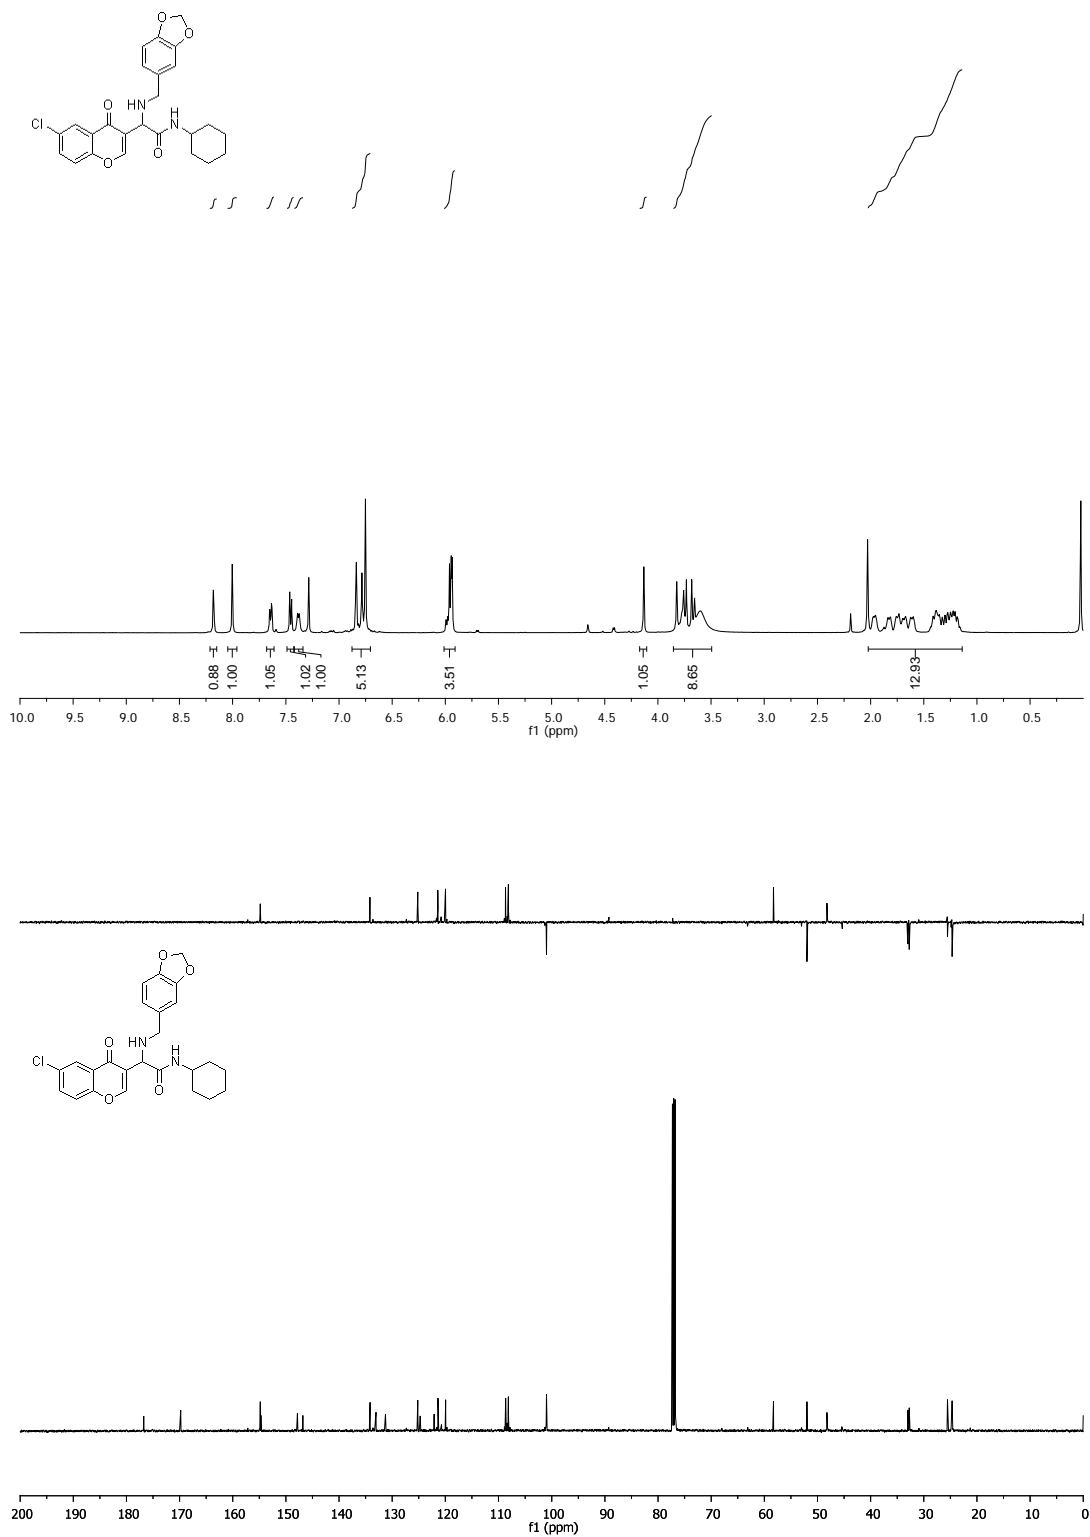



$^1\text{H-NMR}$  and  $^{13}\text{C-NMR}$  of compound **5j**

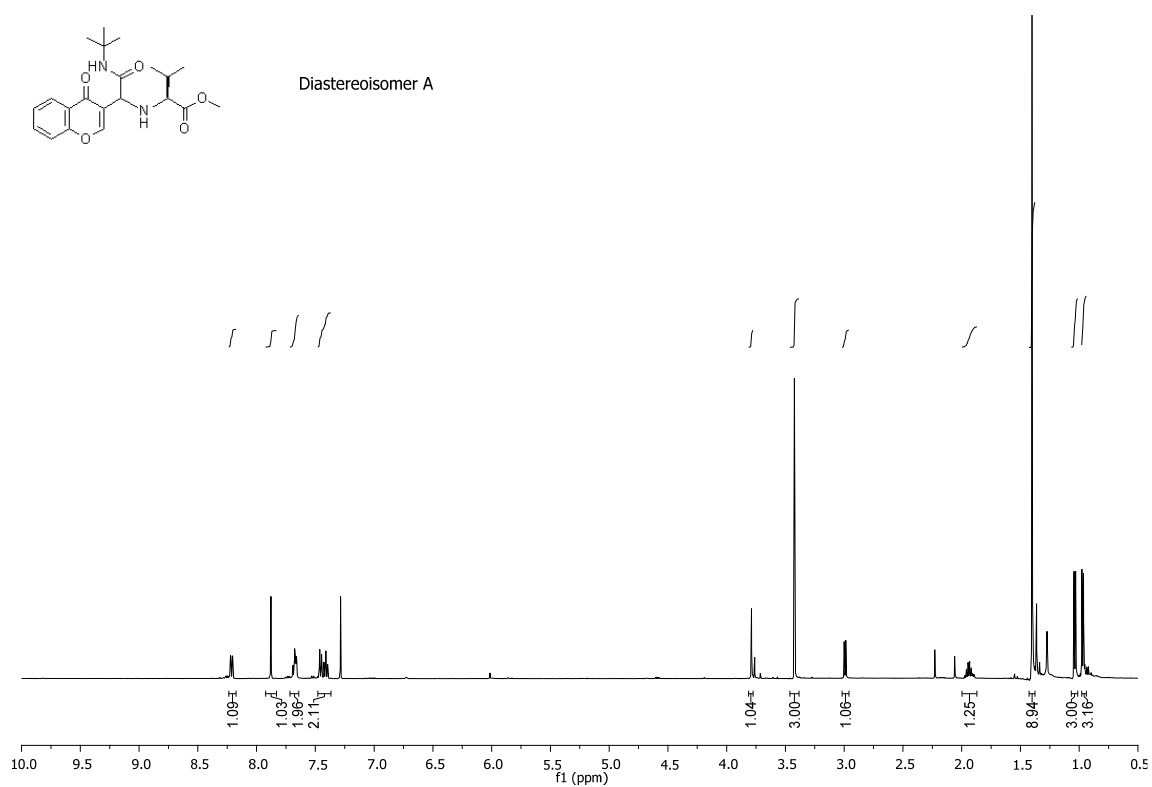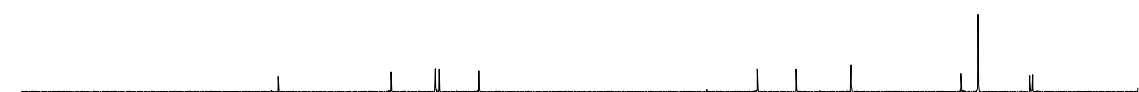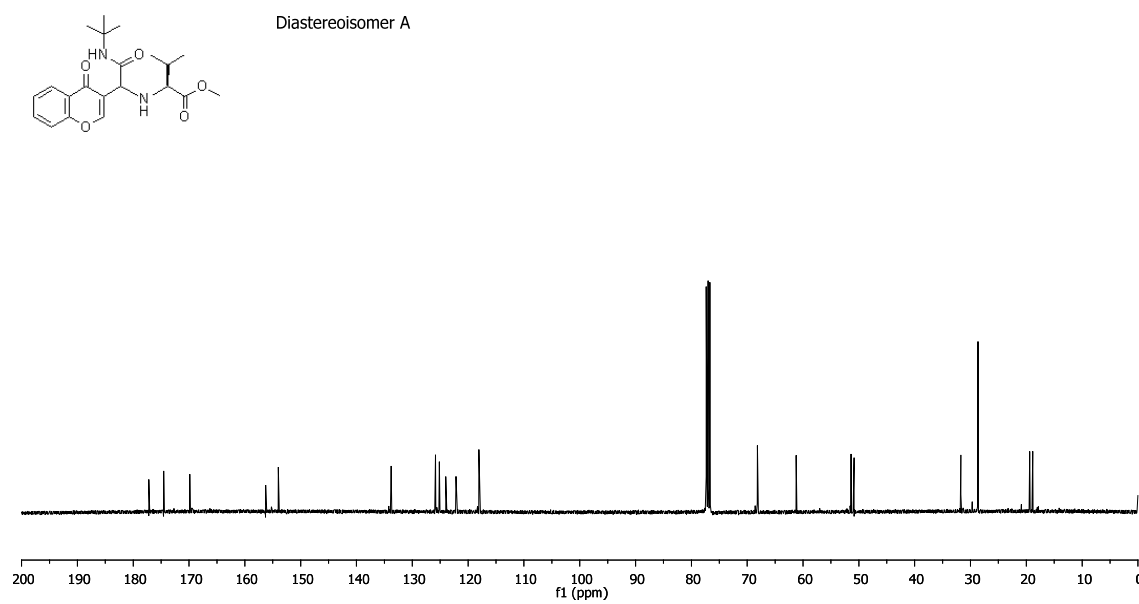

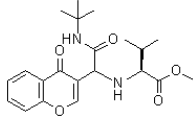

Diastereoisomer B

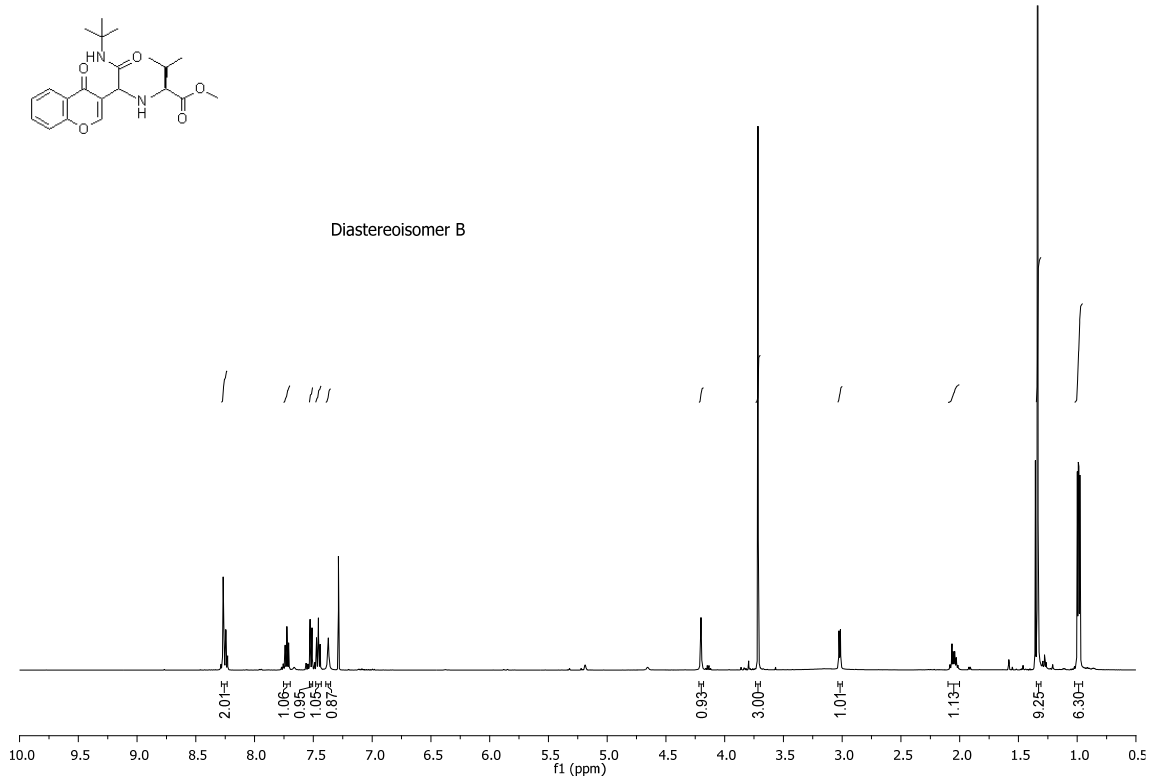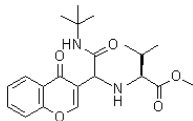

Diastereoisomer B

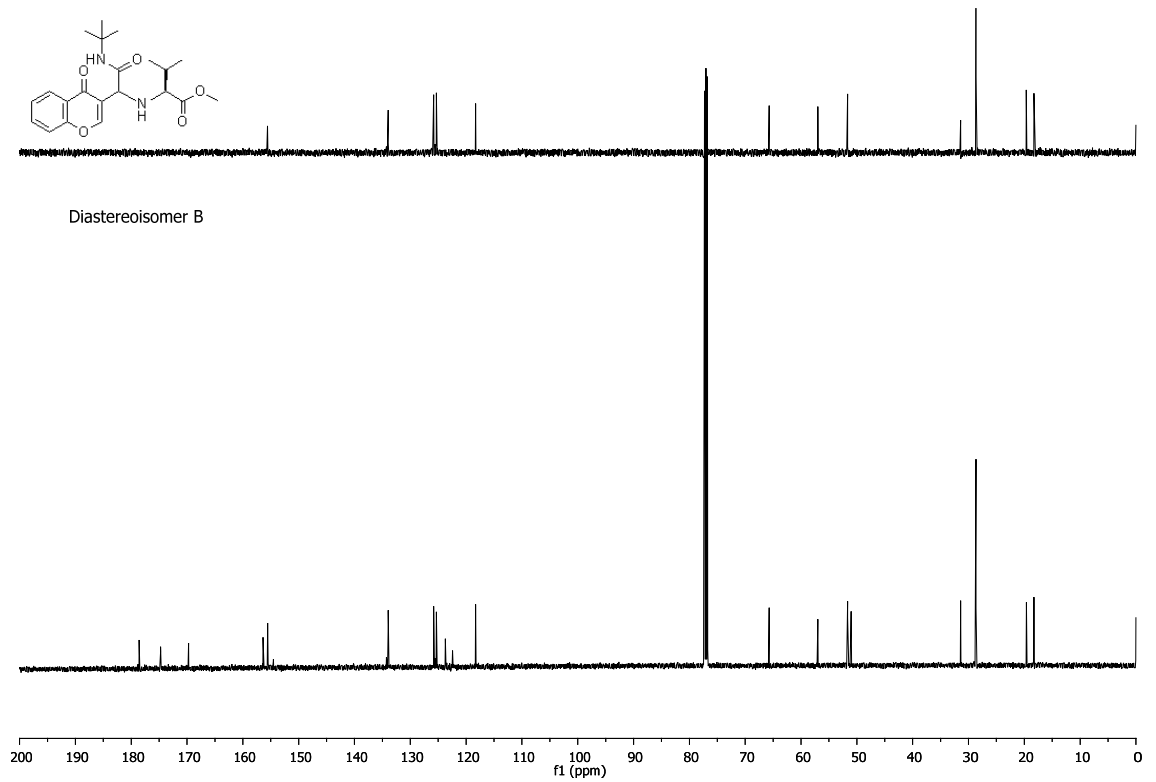

$^1\text{H-NMR}$  and  $^{13}\text{C-NMR}$  of compound **5k**

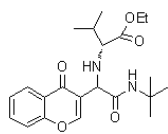

*Diastereoisomer A*

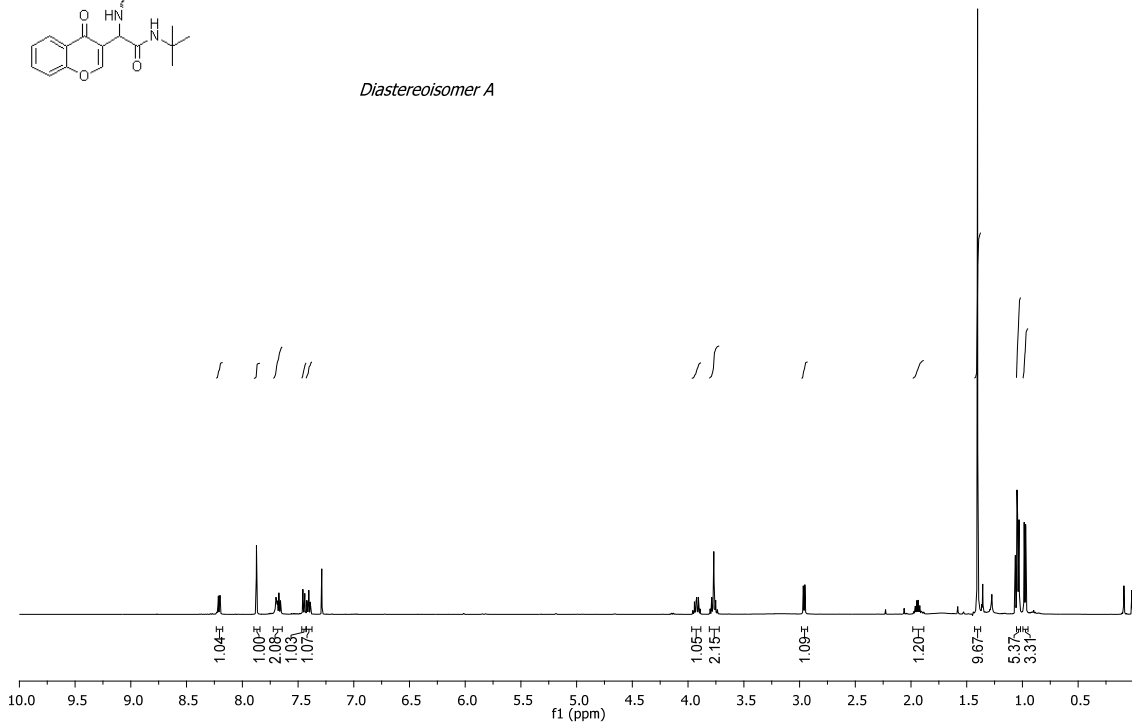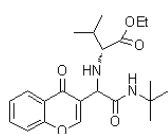

*Diastereoisomer A*

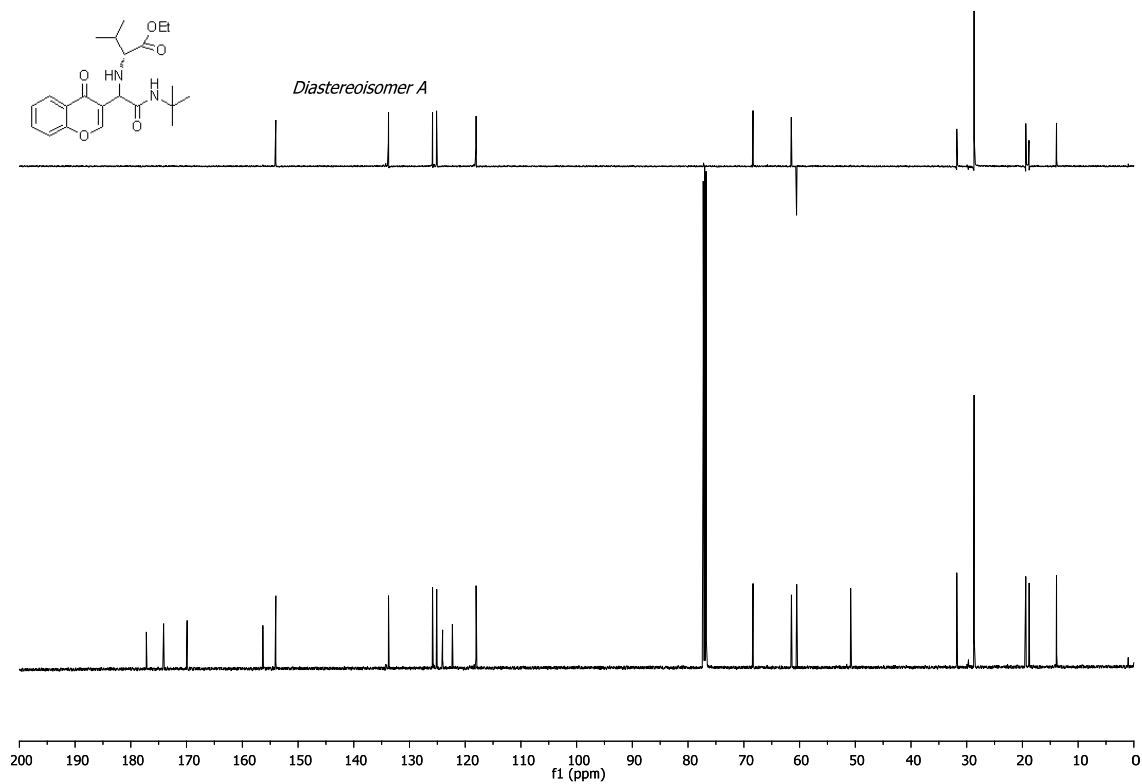

$^1\text{H-NMR}$  and  $^{13}\text{C-NMR}$  of compound **51**

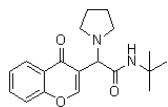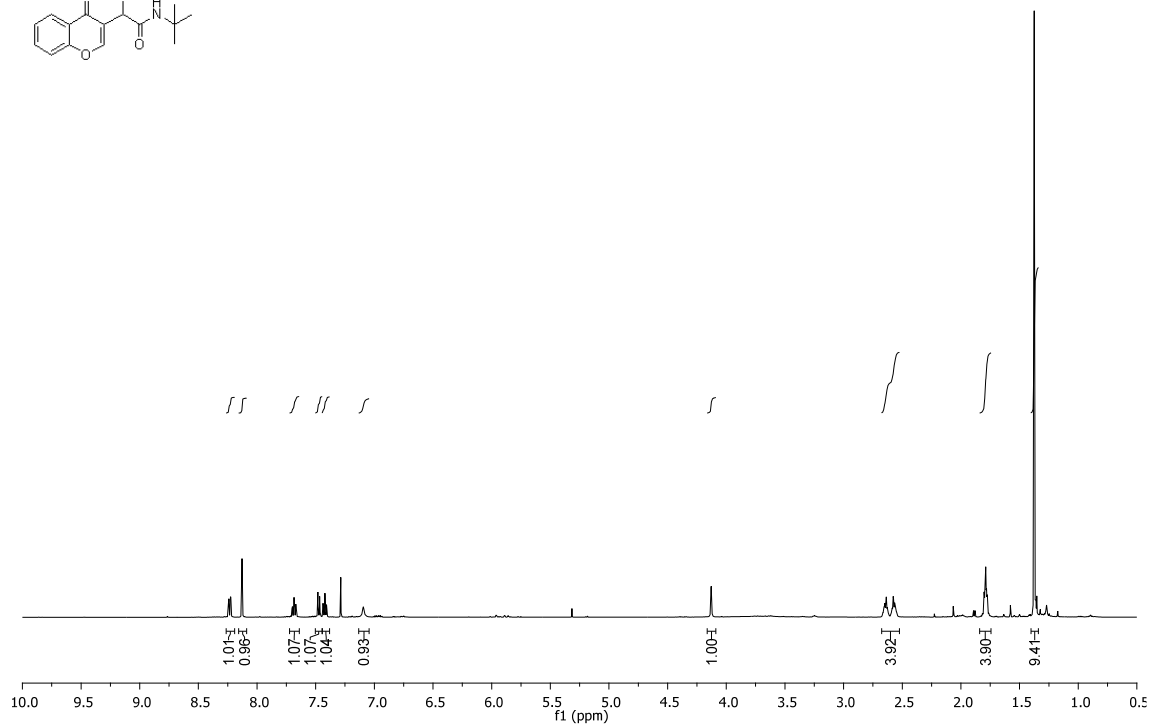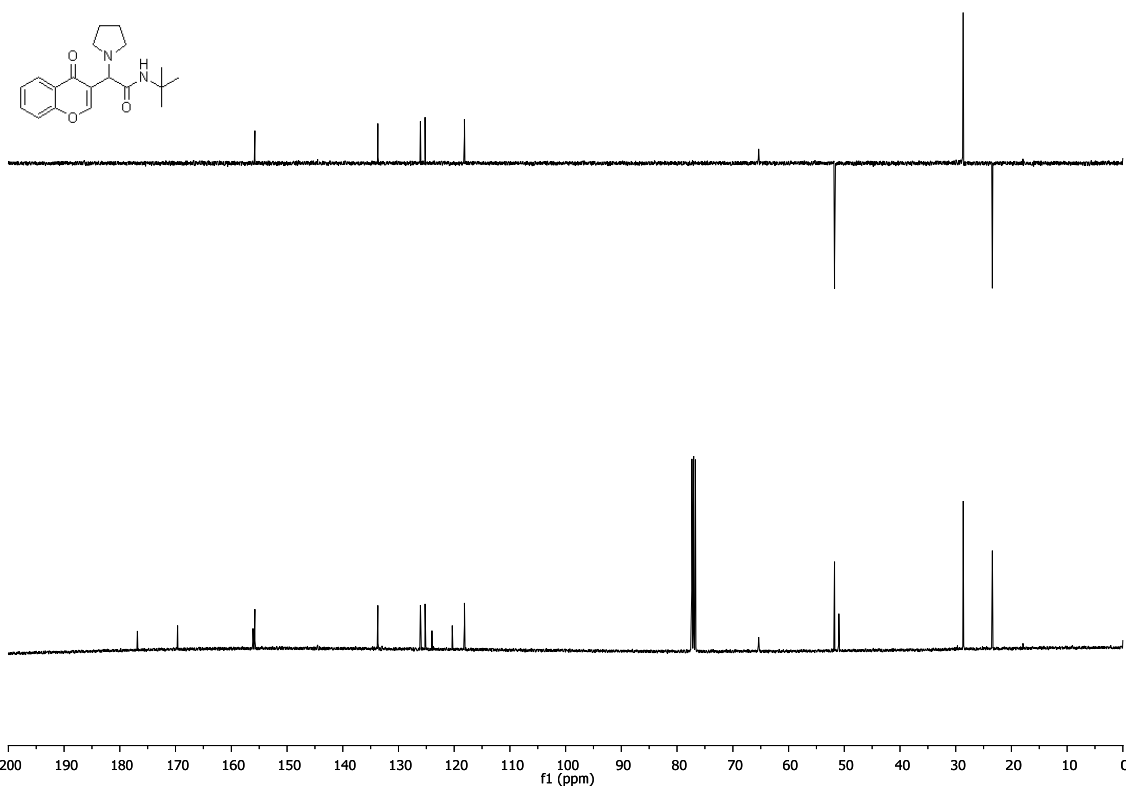

$^1\text{H-NMR}$  and  $^{13}\text{C-NMR}$  of compound **5m**

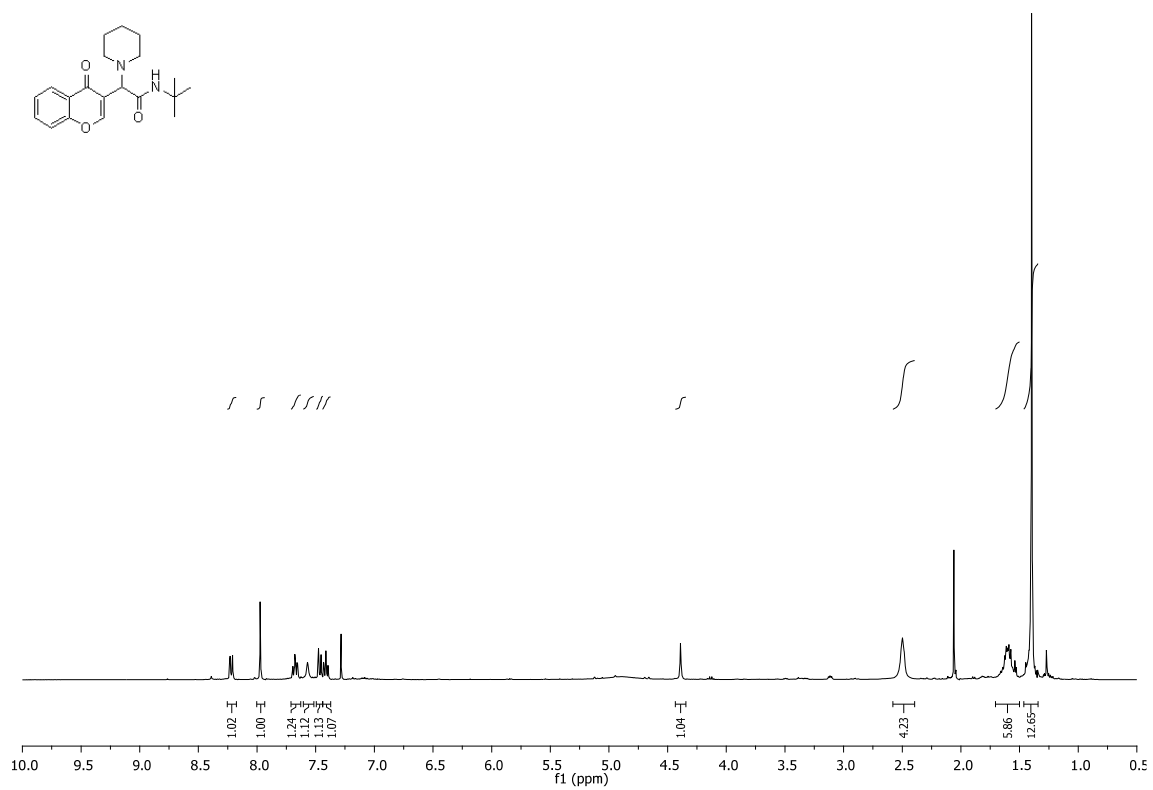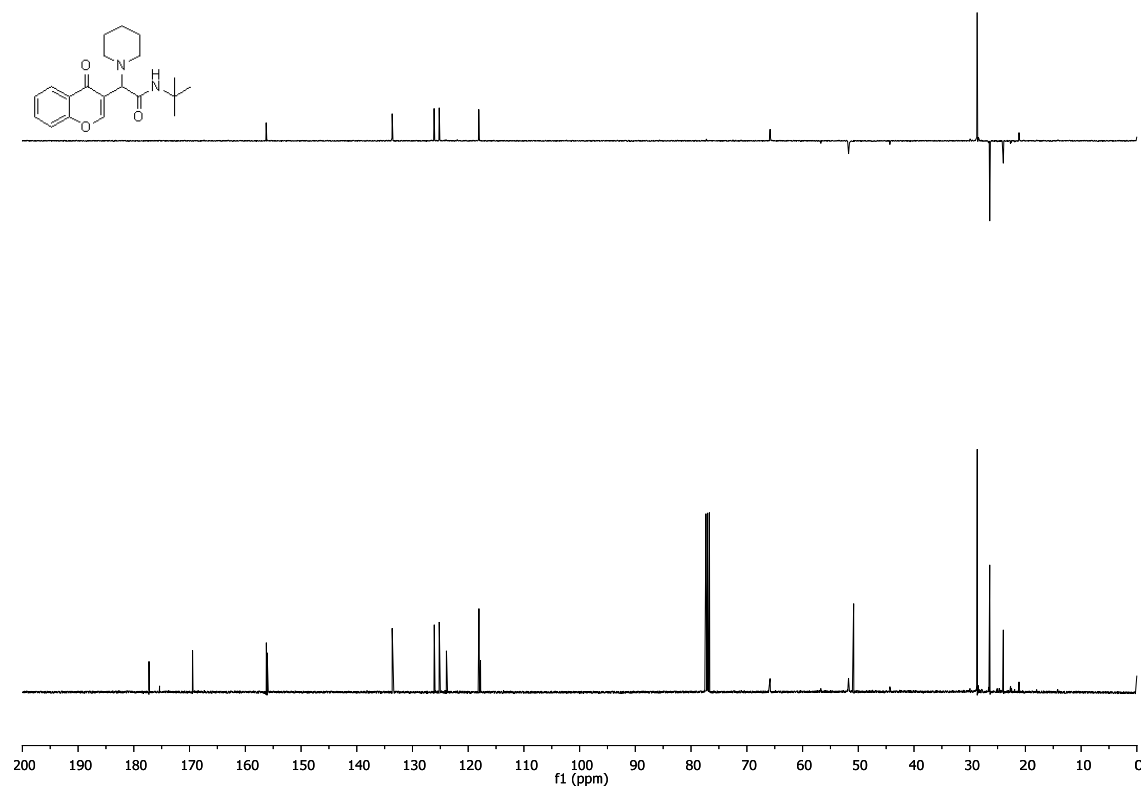

$^1\text{H-NMR}$  and  $^{13}\text{C-NMR}$  of compound **5n**

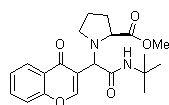

Diastereoisomer A

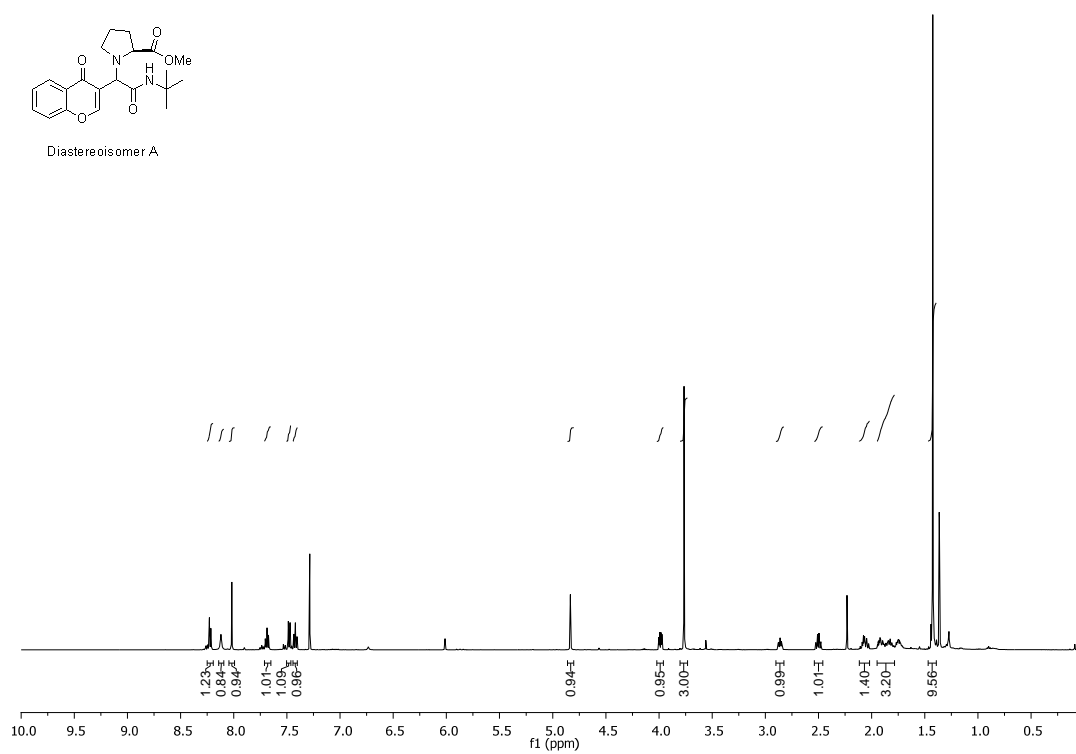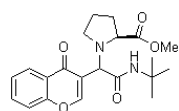

Diastereoisomer A

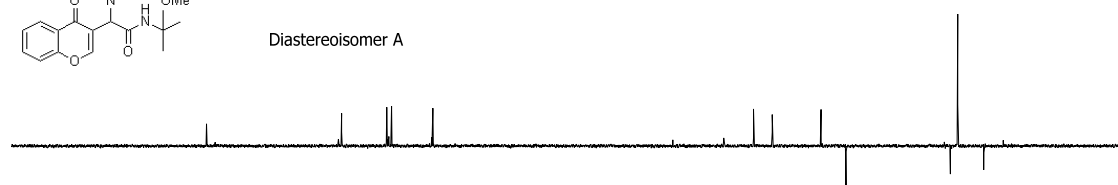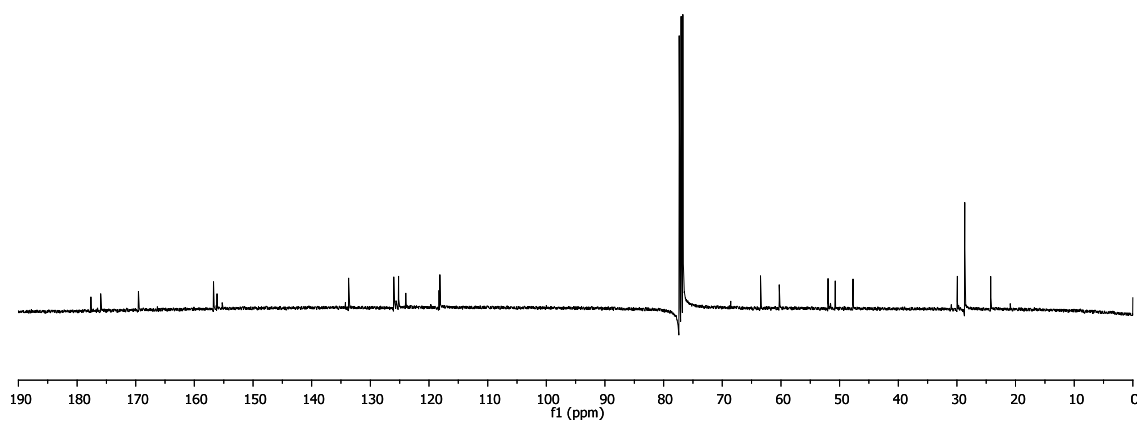

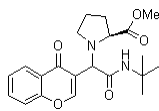

Mixture of diastereoisomers

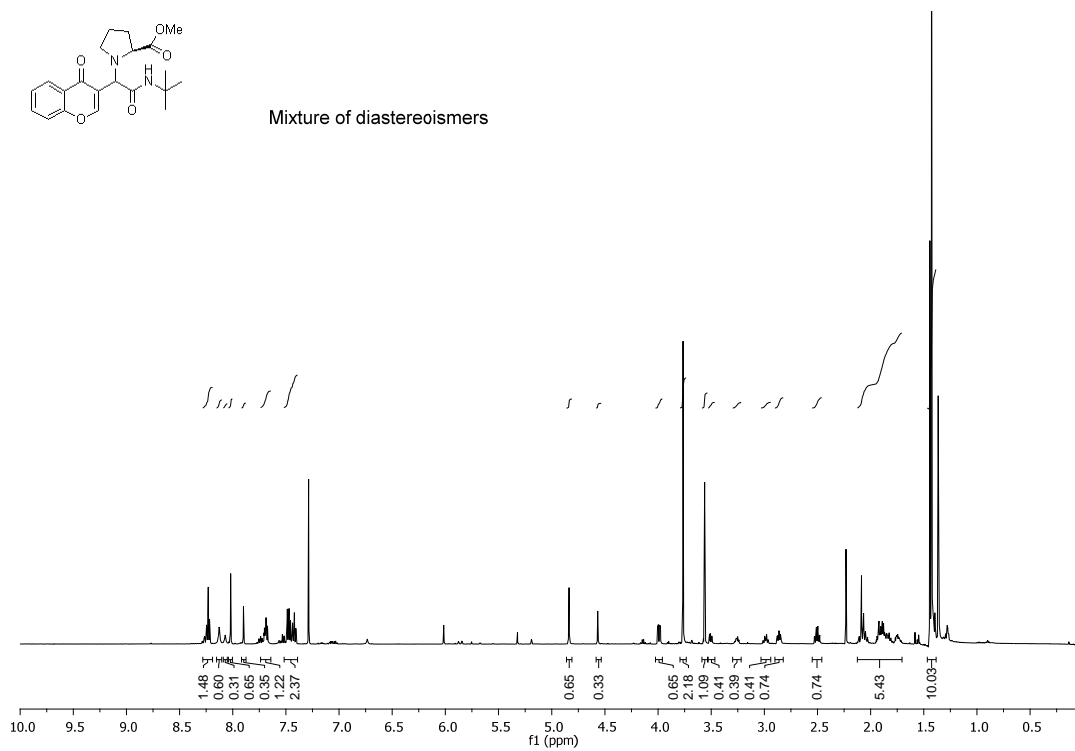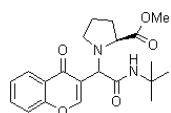

Mixture of diastereoisomers

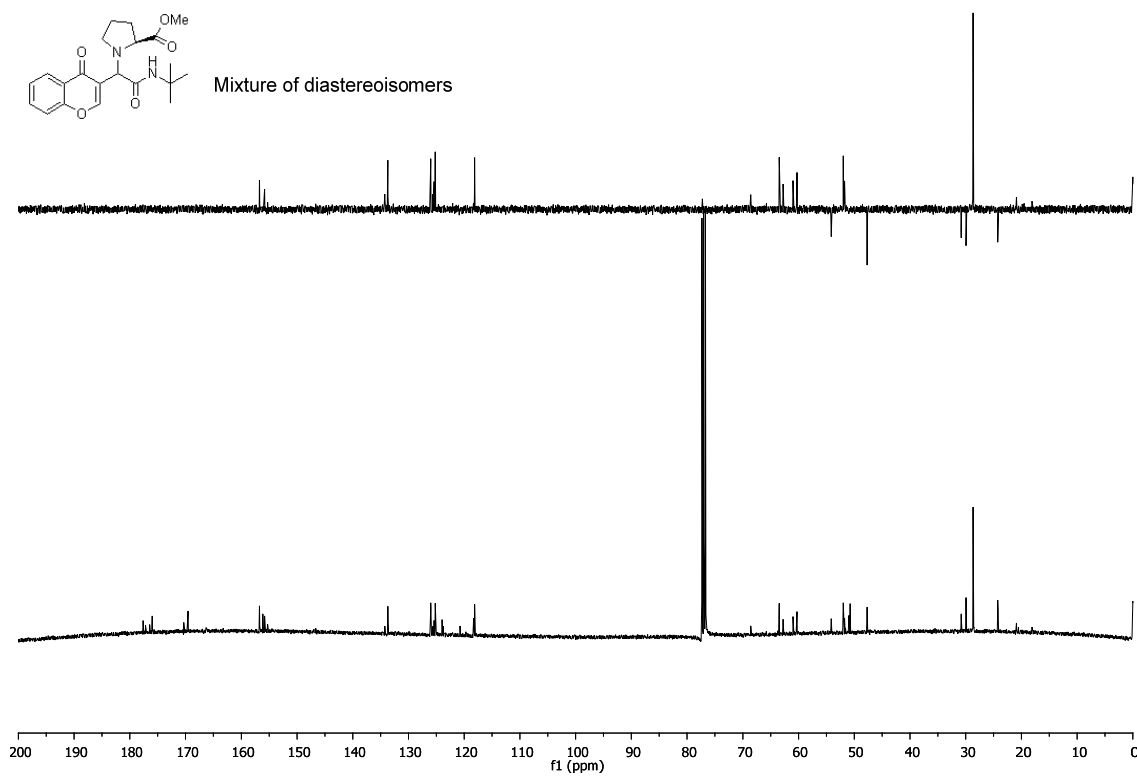

$^1\text{H-NMR}$  and  $^{13}\text{C-NMR}$  of compound **5o**

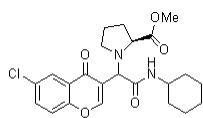

Diastereoisomer A

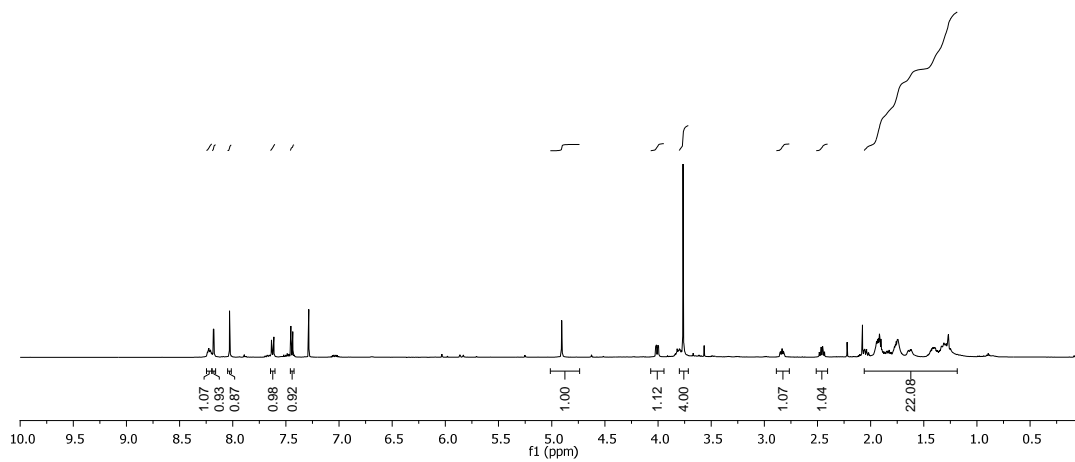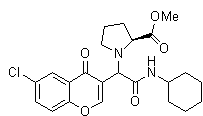

Diastereoisomer A

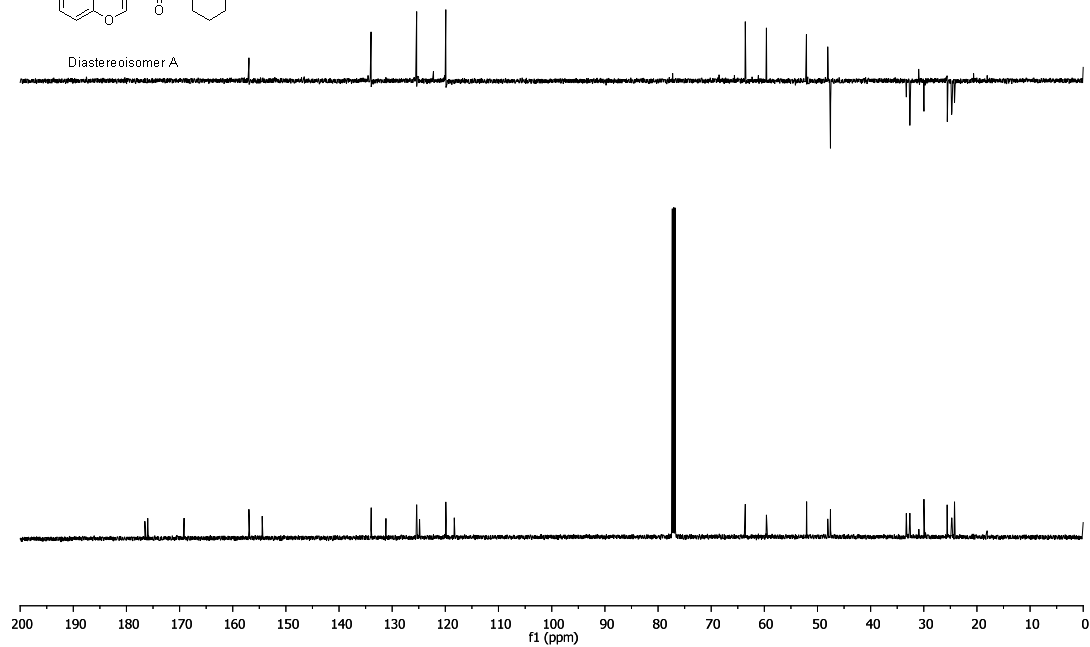



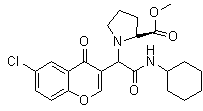

Mixture of diastereoisomers

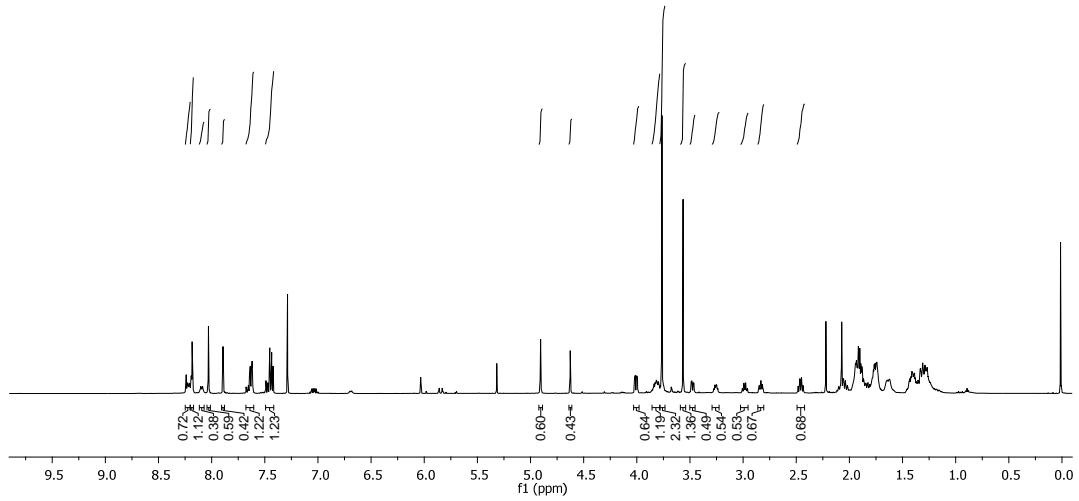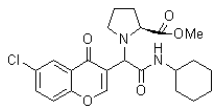

Mixture of diastereoisomers

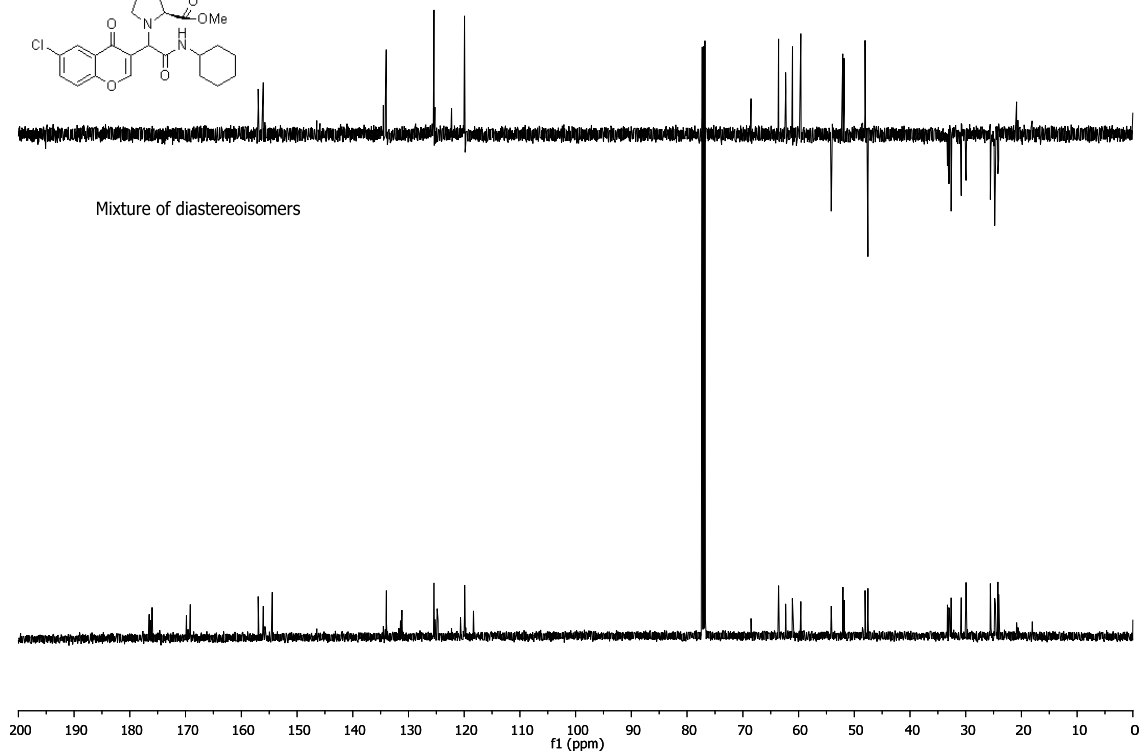

$^1\text{H-NMR}$  and  $^{13}\text{C-NMR}$  of compound **6a**

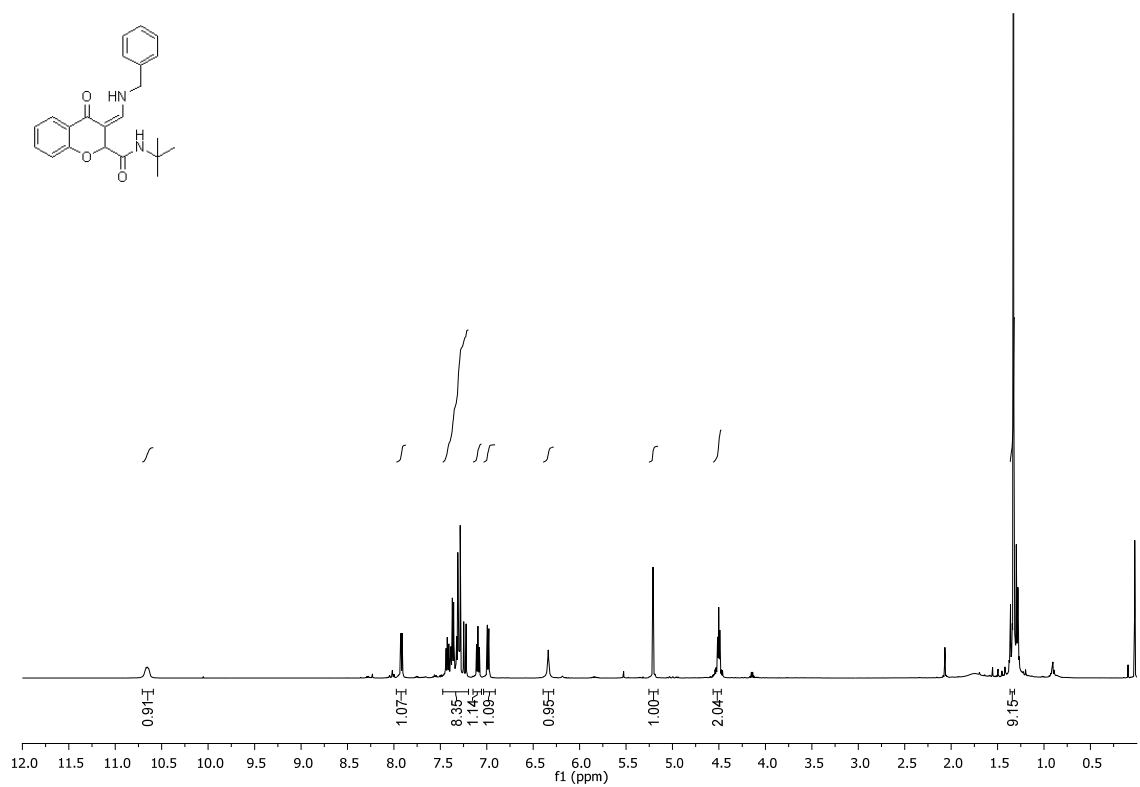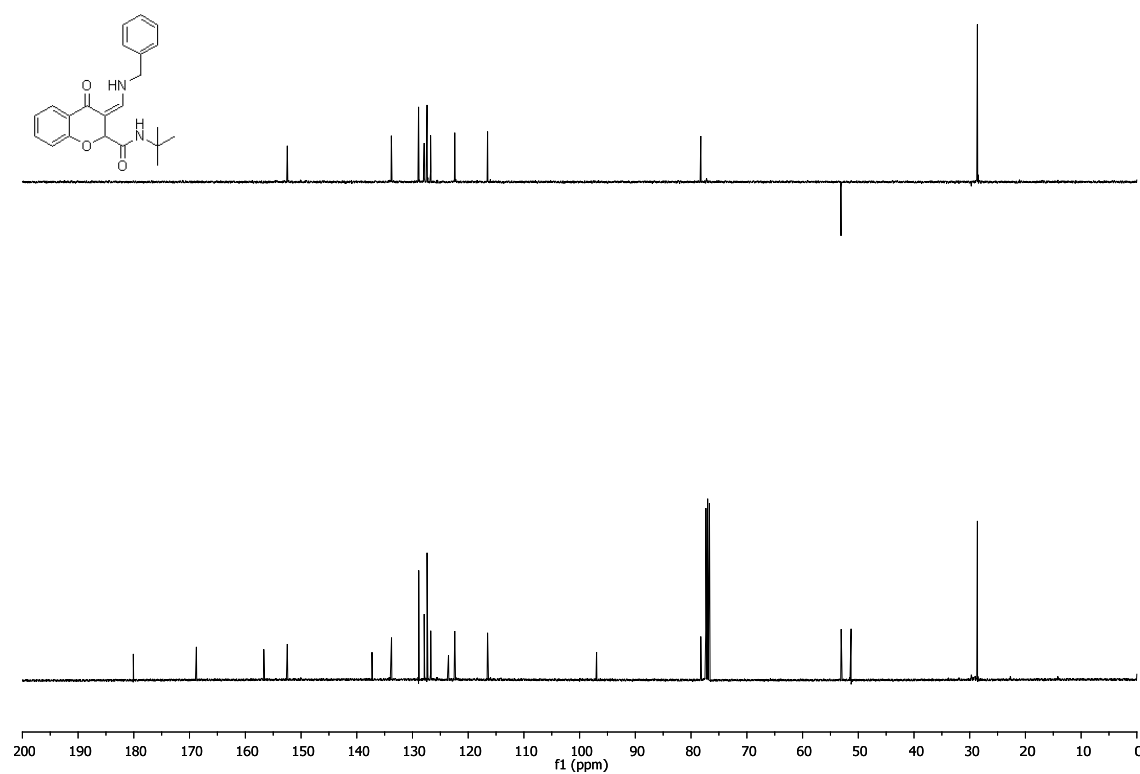

$^1\text{H-NMR}$  and  $^{13}\text{C-NMR}$  of compound **6b**

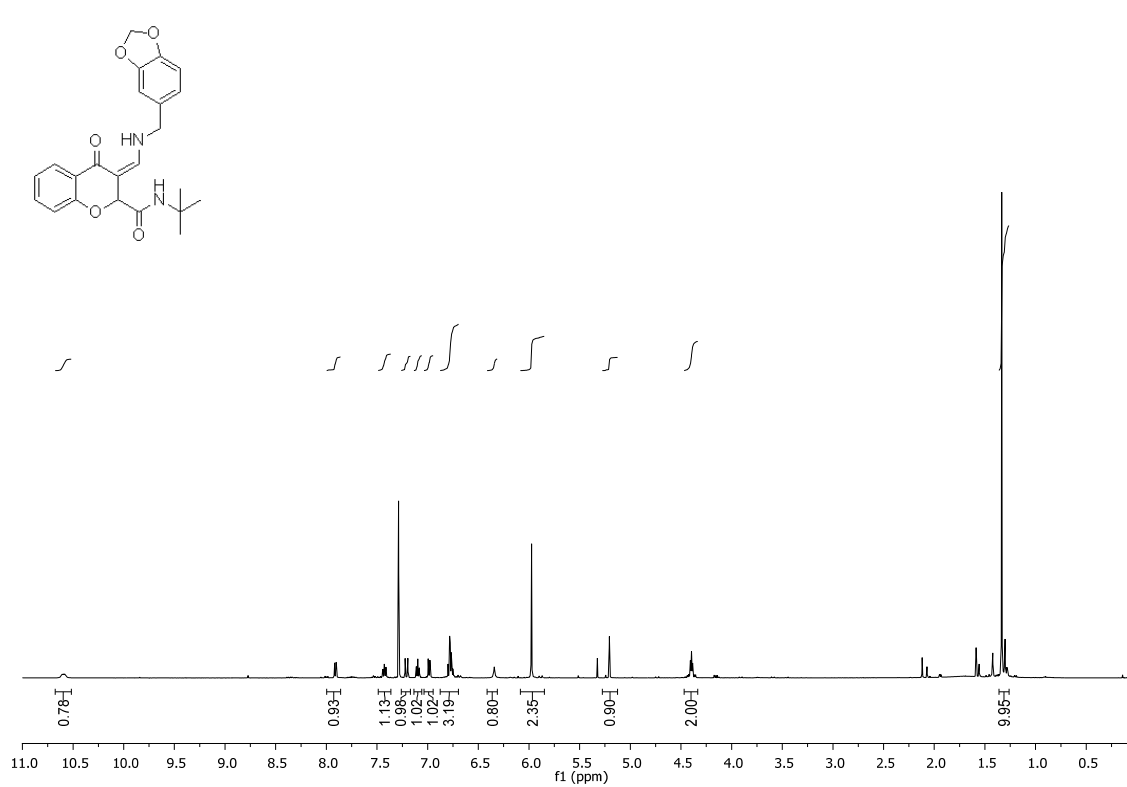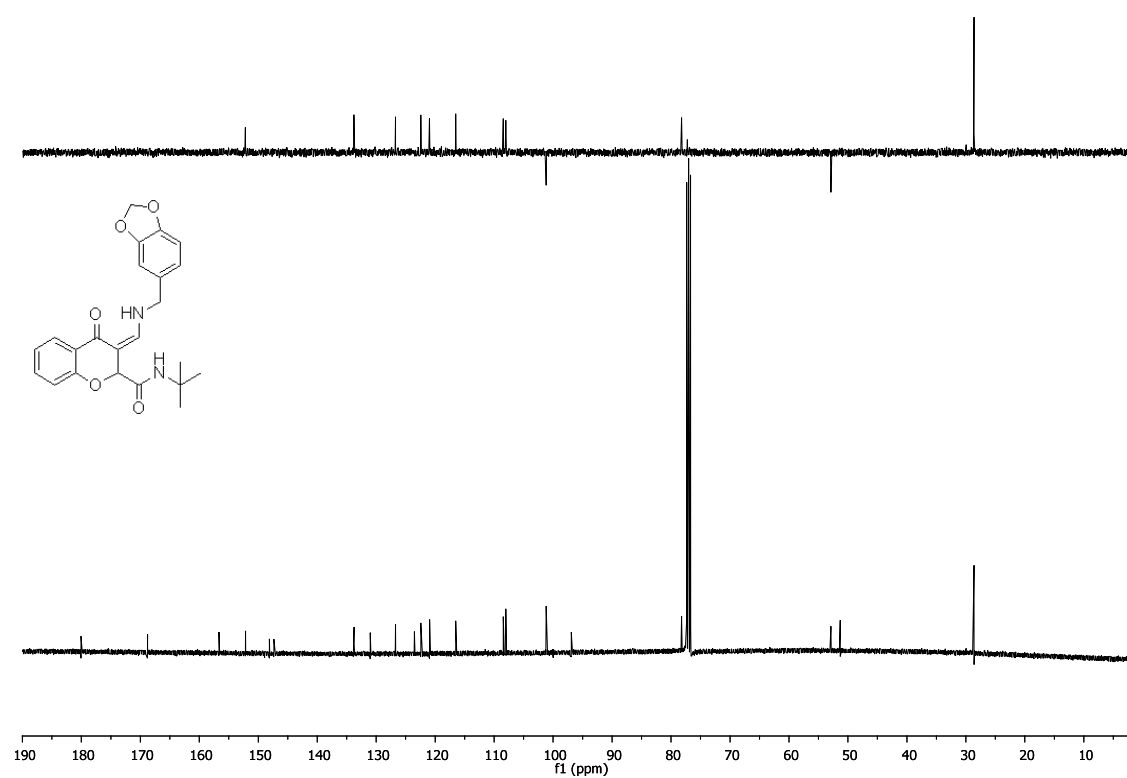

$^1\text{H-NMR}$  and  $^{13}\text{C-NMR}$  of compound **6c**

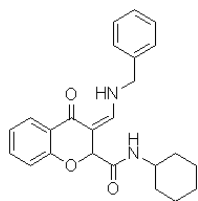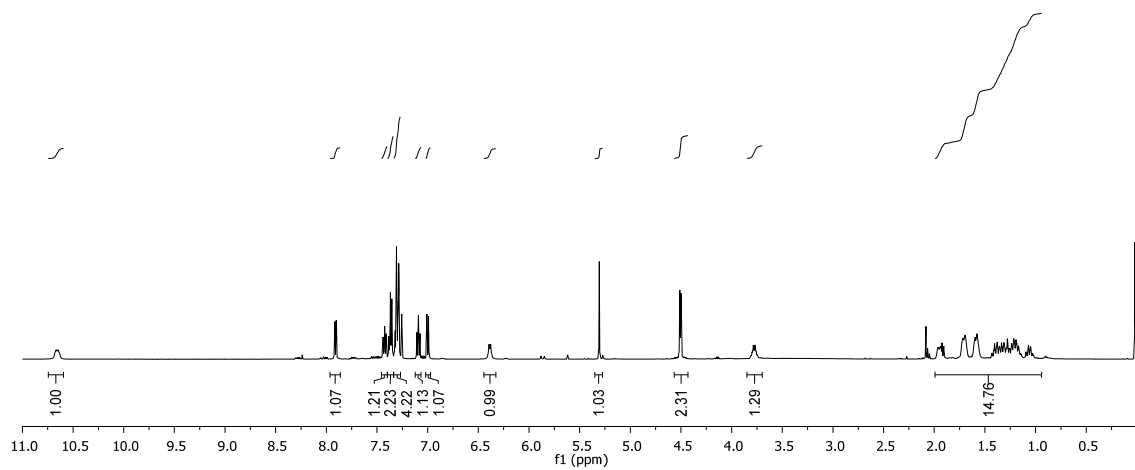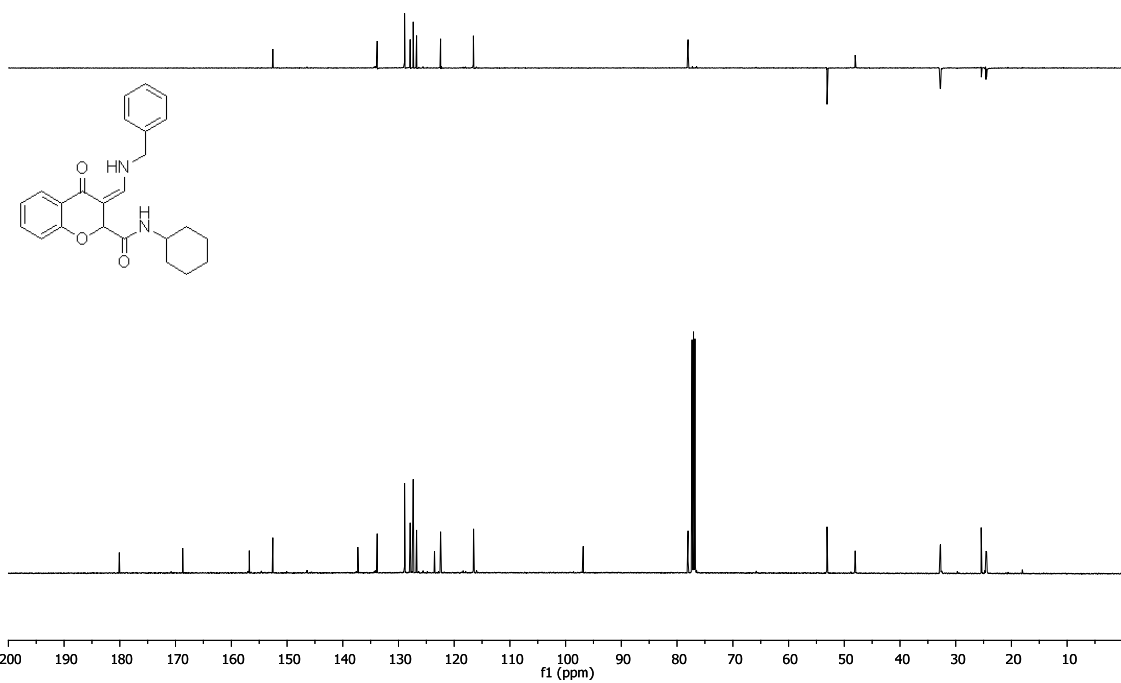

$^1\text{H-NMR}$  and  $^{13}\text{C-NMR}$  of compound **6d**

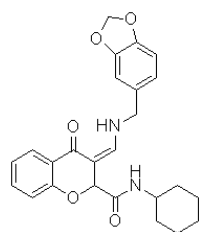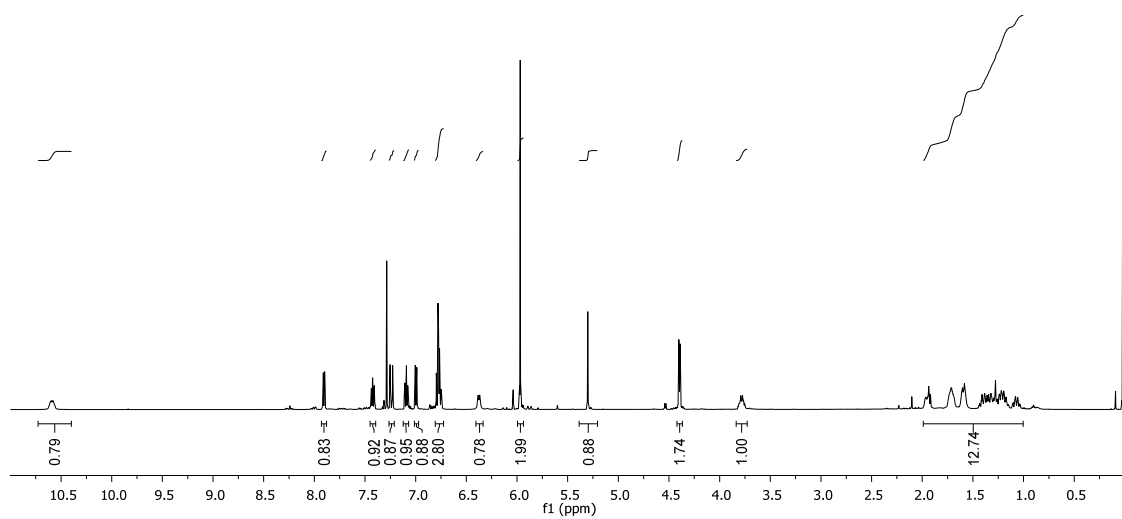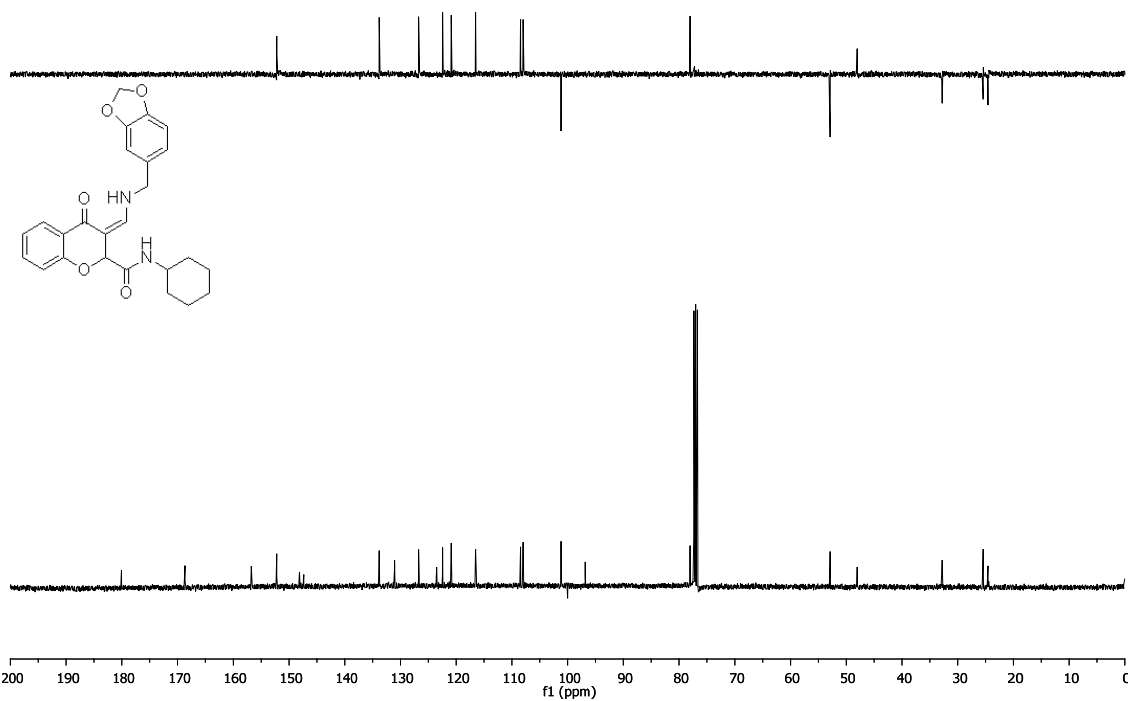

$^1\text{H-NMR}$  and  $^{13}\text{C-NMR}$  of compound **6f**

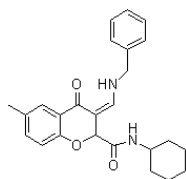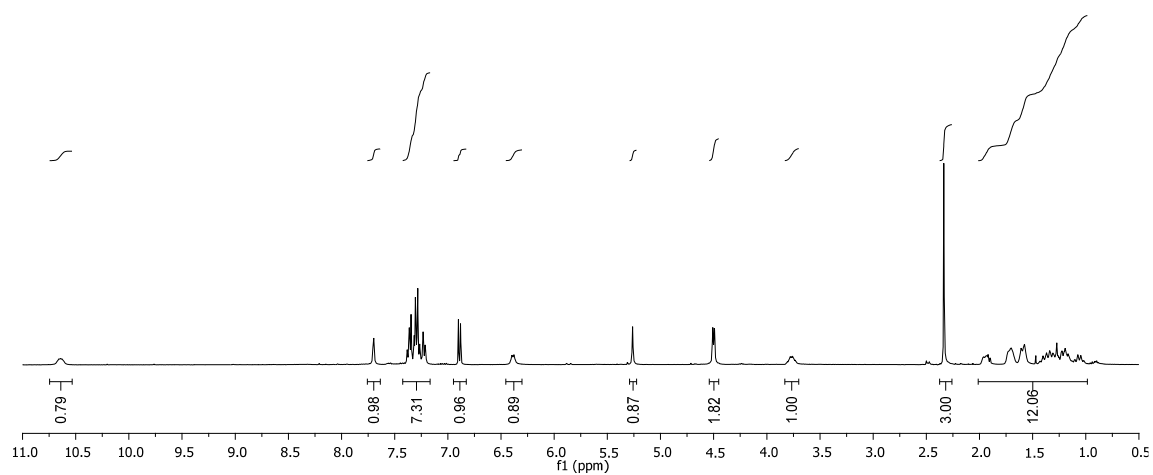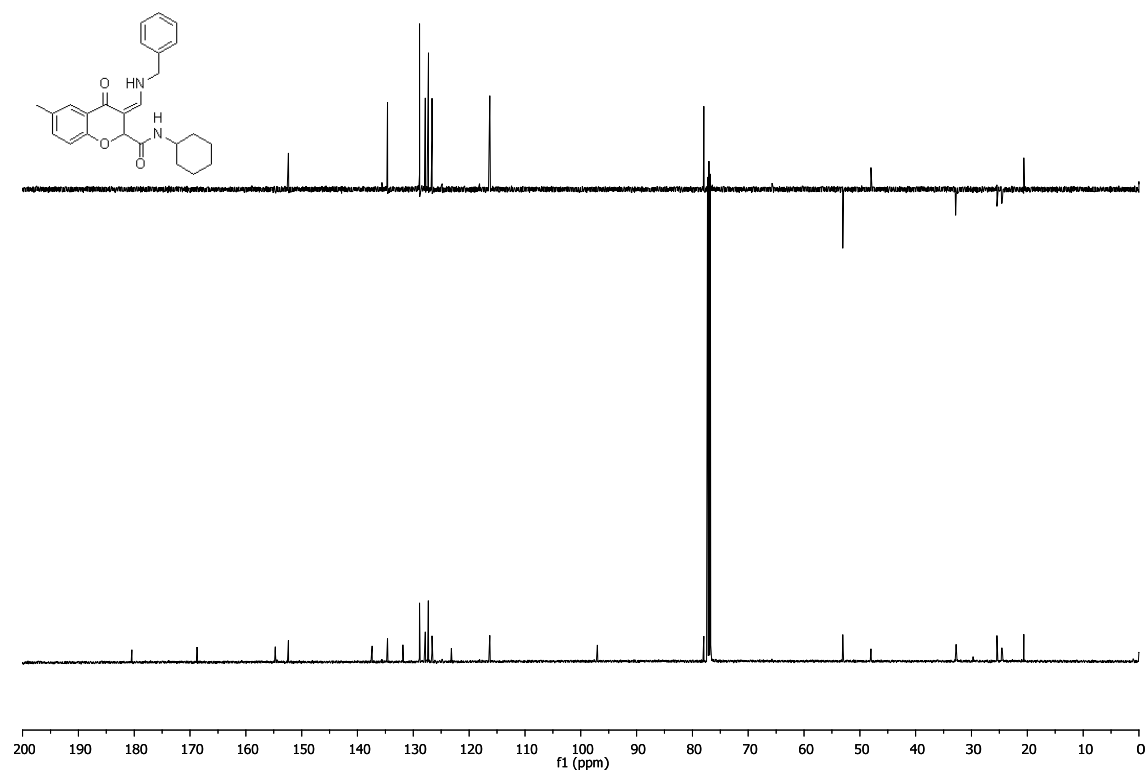

$^1\text{H-NMR}$  and  $^{13}\text{C-NMR}$  of compound **6g**

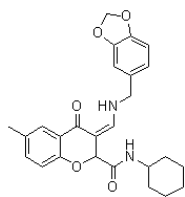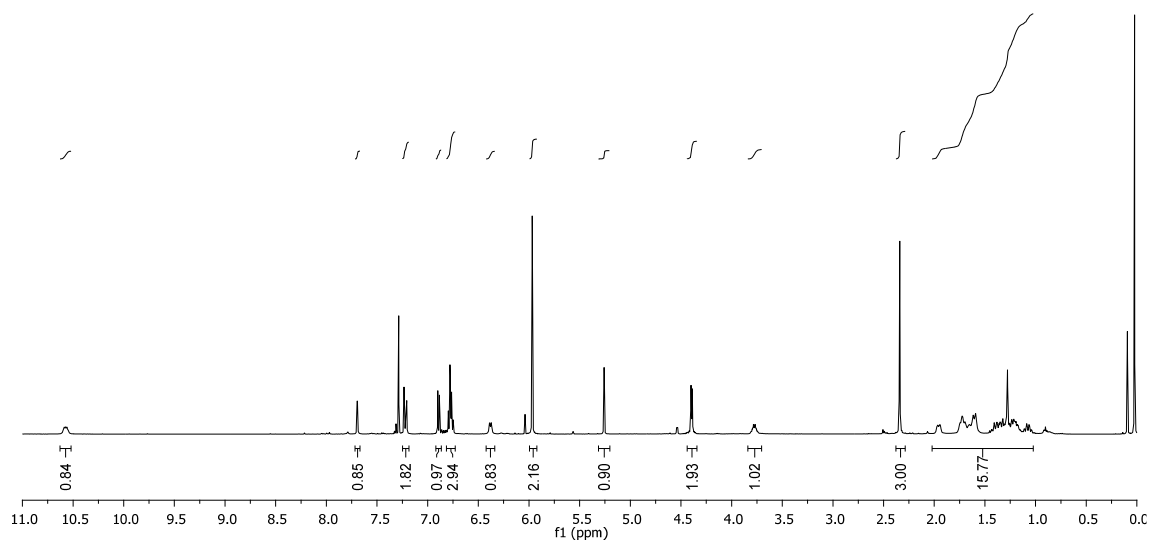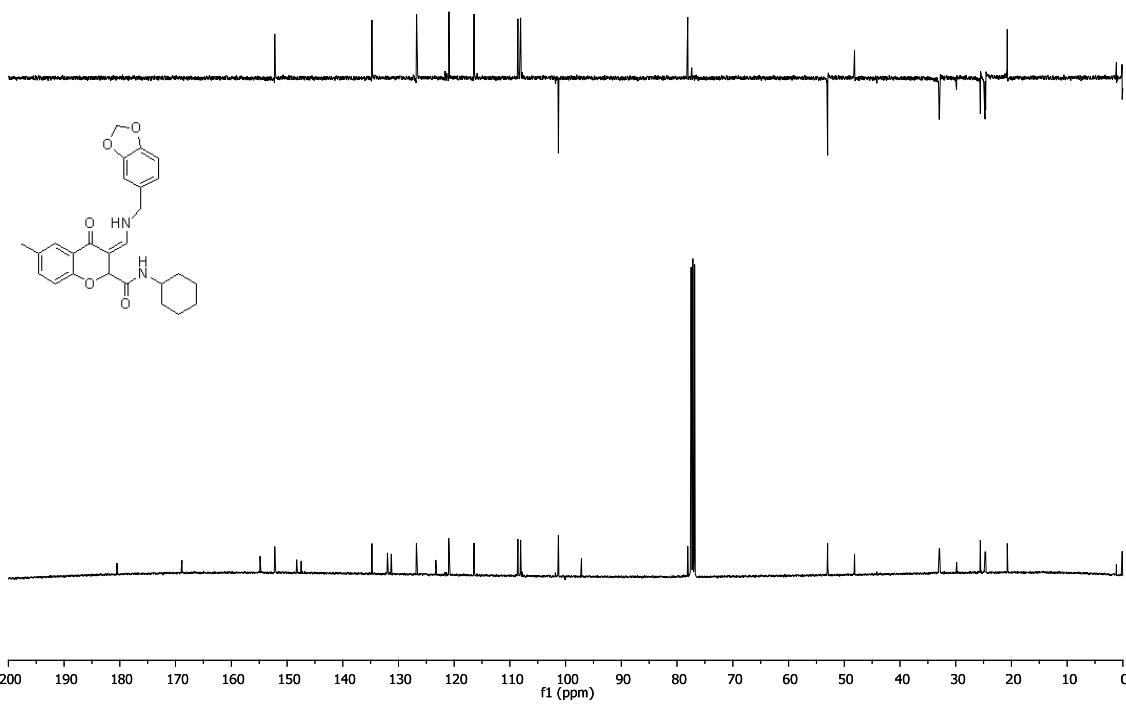

$^1\text{H-NMR}$  and  $^{13}\text{C-NMR}$  of compound **6h**

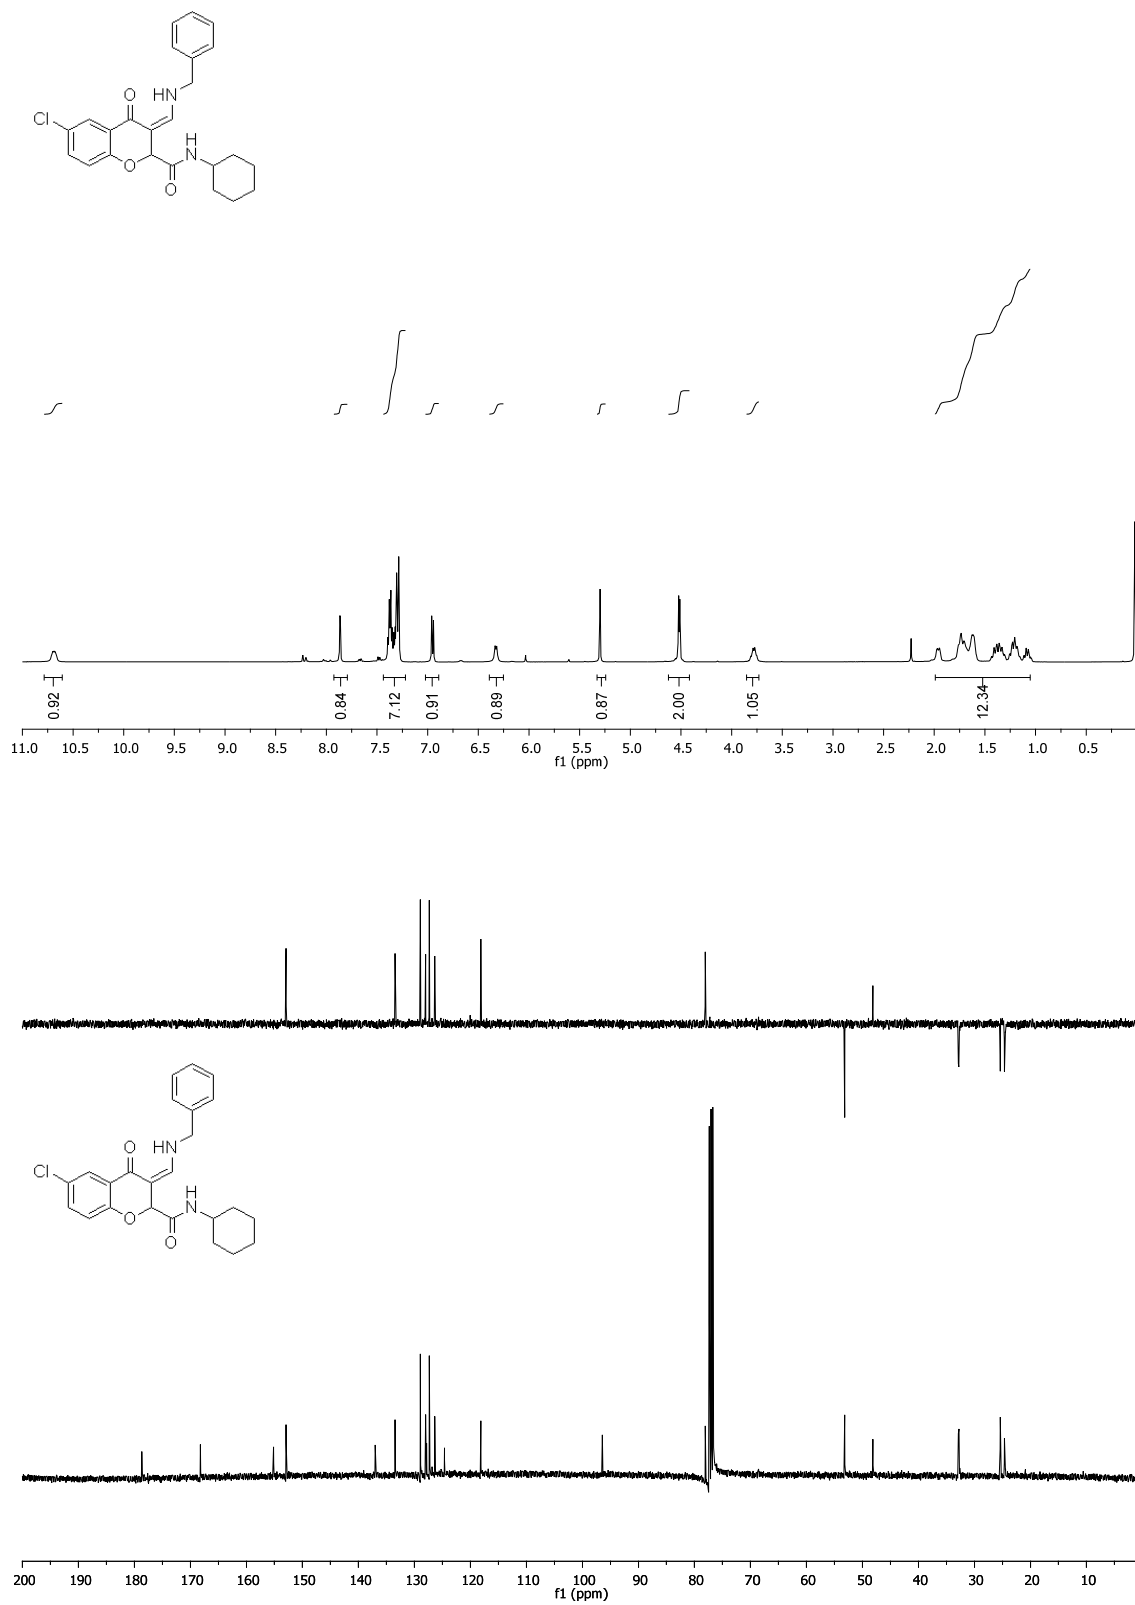



$^1\text{H-NMR}$  and  $^{13}\text{C-NMR}$  of compound **6i**

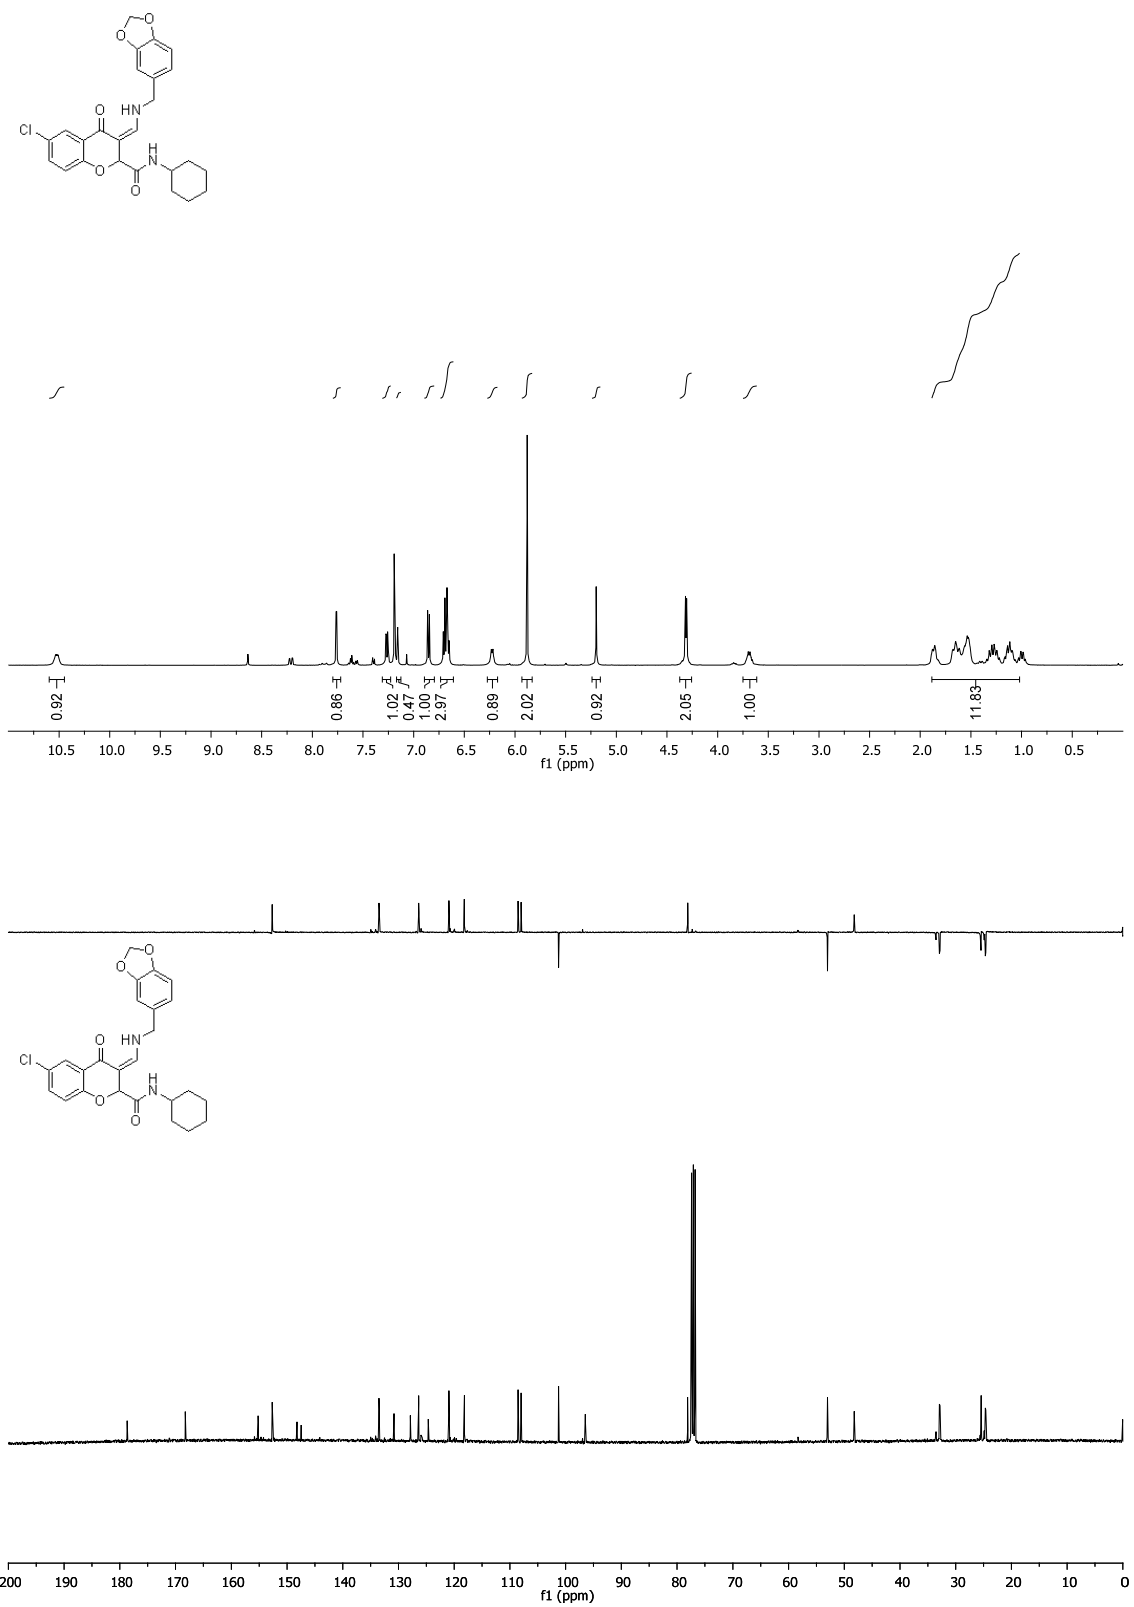

$^1\text{H-NMR}$  and  $^{13}\text{C-NMR}$  of compound **6j**

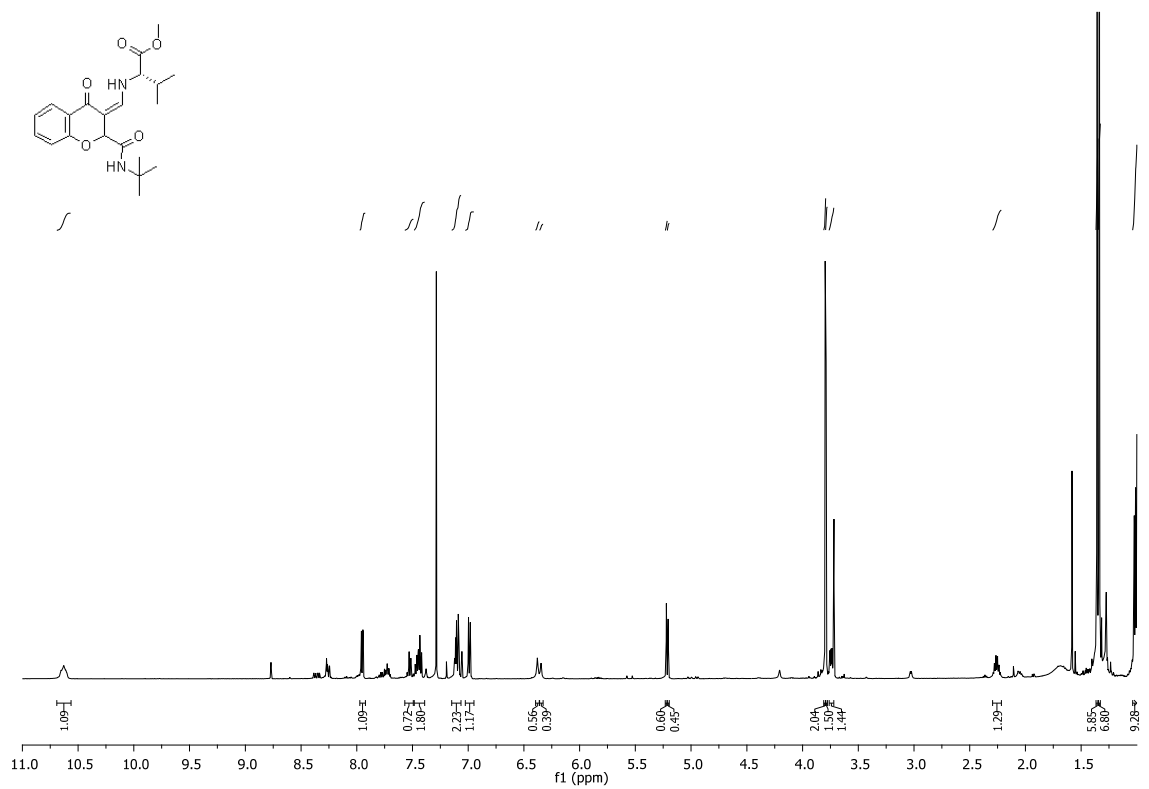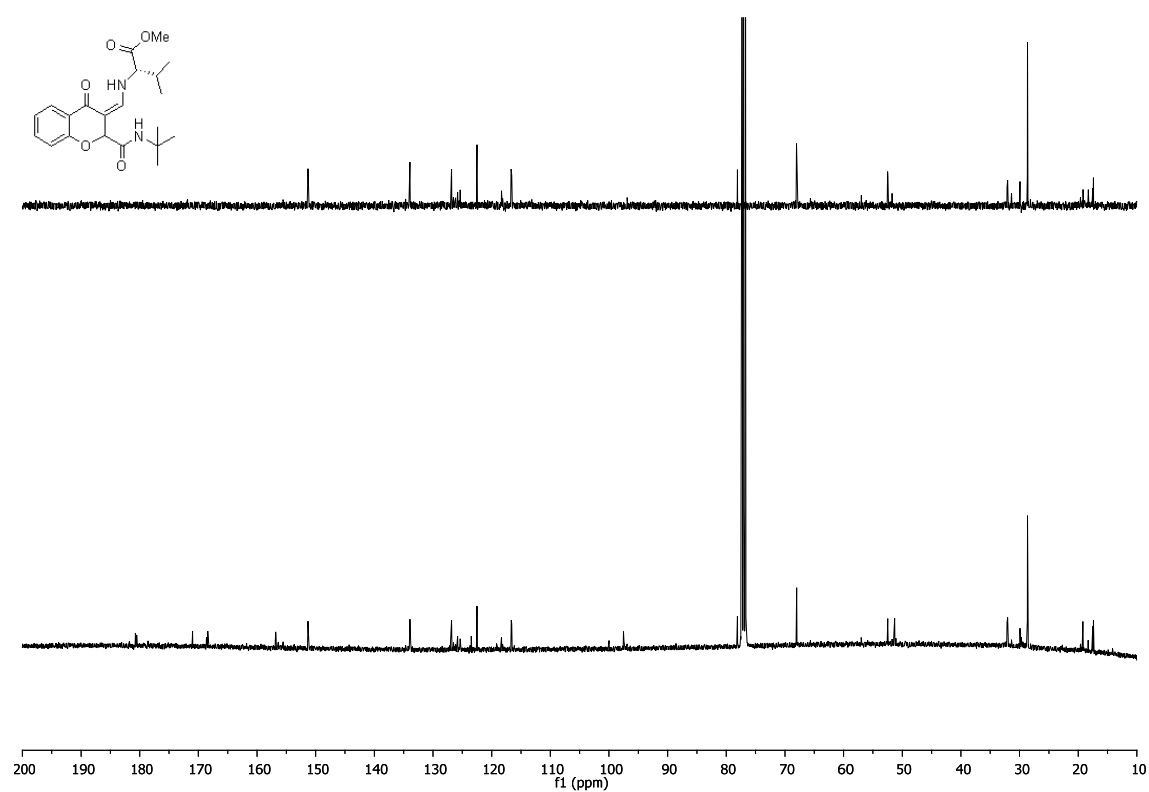

$^1\text{H-NMR}$  and  $^{13}\text{C-NMR}$  of compound **6p**

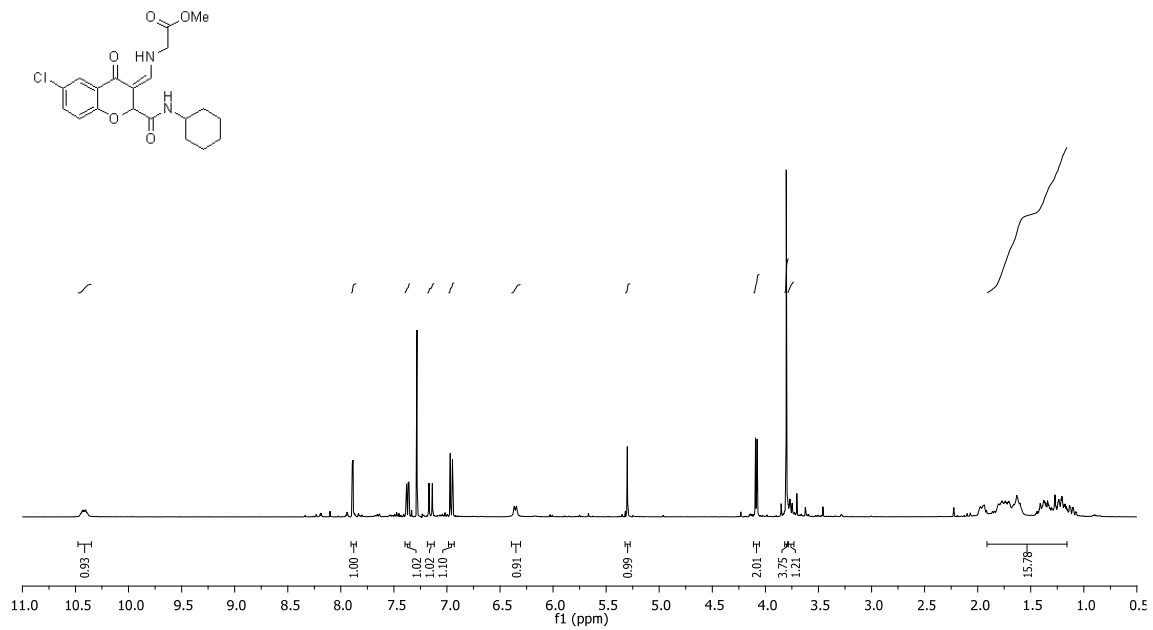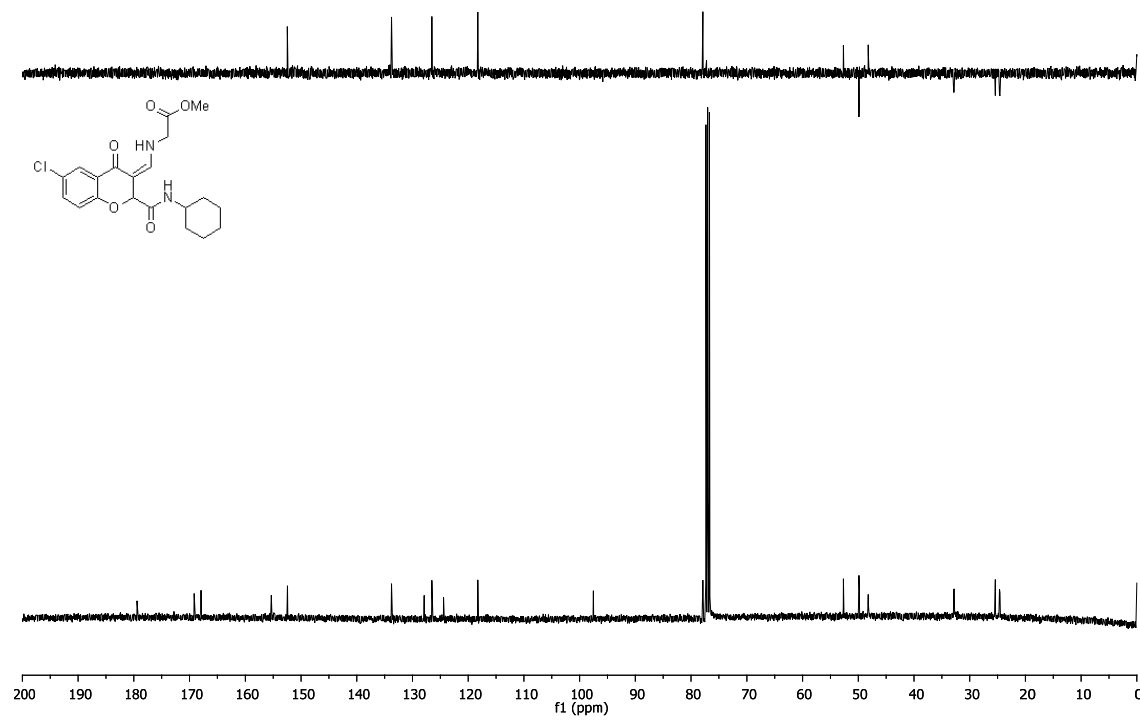

Supplement: c4ra05719h1.pdf [file c4ra05719h1.pdf]
